# Supplementary material
Source: PubMed Central journal article supplement (PMC4817857)
Supplement: NIHMS739730-supplement-Suppl_1.pdf [file NIHMS739730-supplement-Suppl_1.pdf]

Developmental Cell

Supplemental Information

## **A Generic and Cell-Type-Specific Wound Response**

### **Precedes Regeneration in Planarians**

Omri Wurtzel, Lauren E. Cote, Amber Poirier, Rahul Satija, Aviv Regev, and Peter W. Reddien

# Supplementary figures

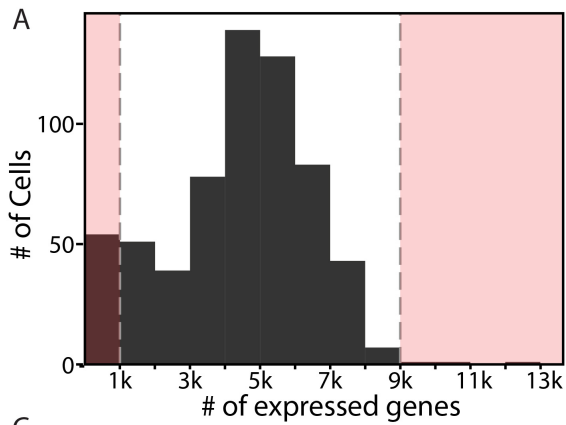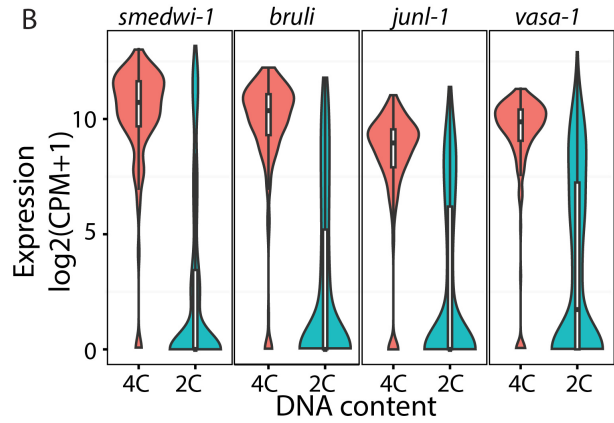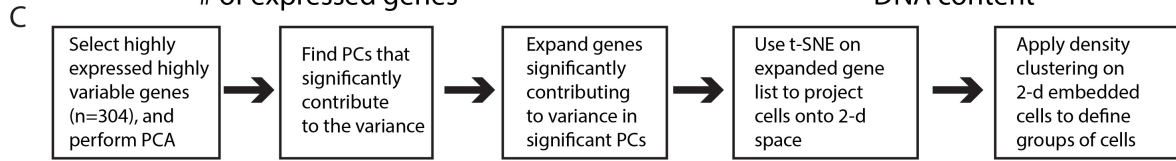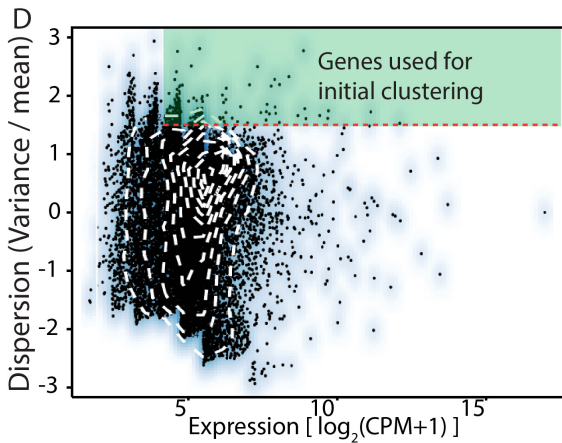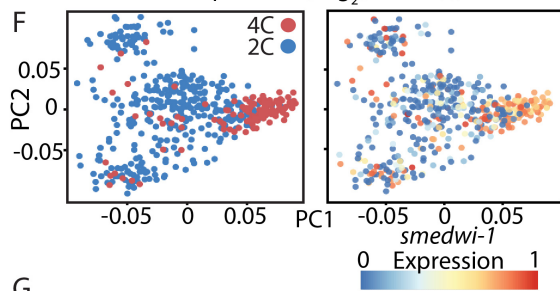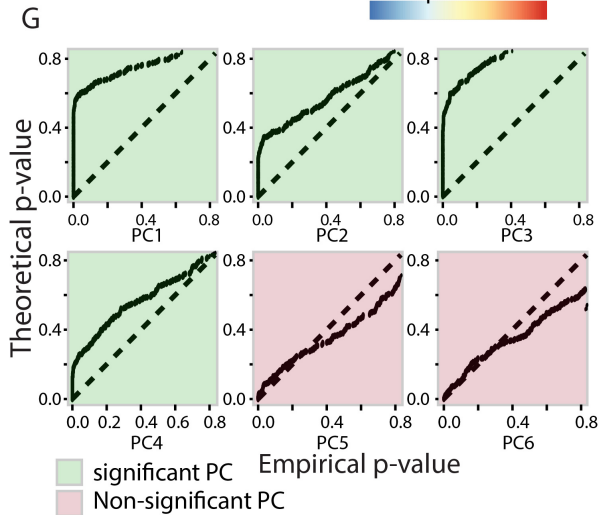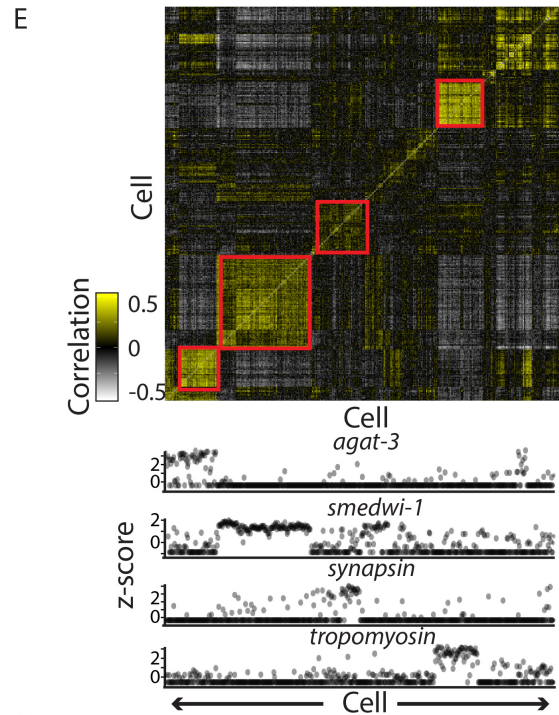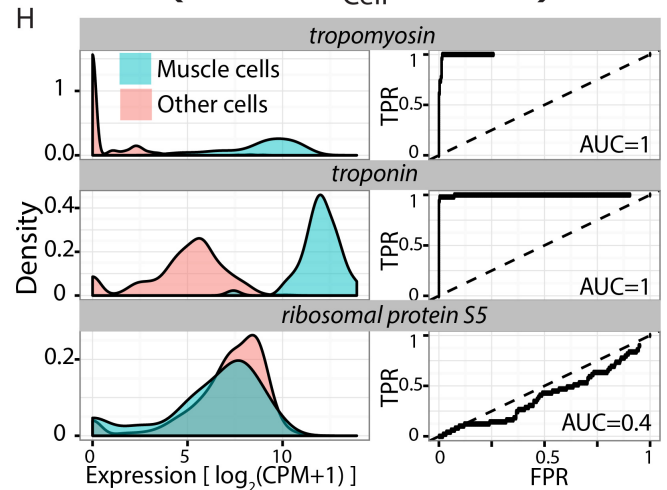

**Figure S1, related to Figure 1. Assessment of single-cell sequencing.** (A) Histogram of the number of genes expressed (CPM > 0) in the single cells used in this analysis. Shaded red regions represent thresholds used for eliminating cells with extremely low or high number of expressed genes. (B) Violin plots of canonical neoblast markers (Wagner et al., 2012) between cells that were collected using FACS from the 4C gate (Methods) compared to the 2C gate. White rectangle represents the interquartile range, black bar is the median. (C) Schematic describing the different steps of analysis performed for assigning cells to clusters. (D) Genes selected for initial clustering exhibited high dispersion and expression across the sequenced-cells (2C: 0h, 4-6, and 12-14 hpi, 4C: 4-6, 12-14 hpi). Black dots with blue hue represent the mean expression of a gene, white dashed contours represent the density of the dots as obtained by 2d kernel density estimation with 25 bins (kde2d). Green shaded rectangle outlines the selection of genes for the initial clustering. (E) Upper panel: Correlation matrix generated based on the initial set of genes. Cell-order was determined by hierarchal clustering of the cells based on the initial set of genes used for clustering. Red rectangles represent cells co-expressing canonical markers for several cell types: *smedwi-1* for neoblasts, *tropomyosin* for muscle, *synapsin* for neural cells, and *agat-3* for *late epidermal lineage* cells. (F) Left panel: PCA projection of individual sequenced cells (dots), based on the initial set of genes (n=304) used for clustering. PC1 separates the dividing cell fraction from cells that are not dividing (red and blue; 4C and 2C DNA content, respectively; DNA content determine by Hoechst dye analysis during cell isolation with FACS; Methods). Right panel: The same PCA projection is shown with the cells colored based on their rank of expression of the canonical neoblast marker *smedwi-1* (blue, yellow, and red correspond to low, medium and high). Most of the *smedwi-1* expressing cells are separated by PC1. (G) Testing the significance of different principal components through Jackstraw analysis (Chung and Storey, 2015). Each subplot is a quantile-quantile plot (qqplot) of gene p-values in the principal component, as determined by a jackstraw analysis compared to theoretical p-values based on sampling from uniform distribution (Extended experimental procedures). Empirical values near the dashed lines fit a uniform distribution and hence are not considered for further testing (in this case genes were selected from principal components 1 through 4). Green and red backgrounds represent PCs found to be significant and non-significant, respectively, through this analysis. (H) Example of classification of genes to clusters. Shown is the cluster we subsequently determined to be muscle. Left panel: For every cluster, a list of genes that are highly expressed compared to all other clusters was assembled. Shown is the expression of the canonical muscle markers *tropomyosin* and *troponin*, and a negative control *ribosomal protein s5* (top, middle, and

bottom, respectively; blue and red area, muscle cluster, and all other clusters, respectively).  
Right panel: The ability of individual genes to partition the cells to the tested cluster is plotted by the true positive rate (TPR; sensitivity) and false positive rate (FPR;  $1 - \text{specificity}$ ) of the assignments, and the area under the curve. The diagonal (dashed black line;  $\text{AUC}=0.5$ ) represents random assignment to the cluster, such as observed for the negative control.

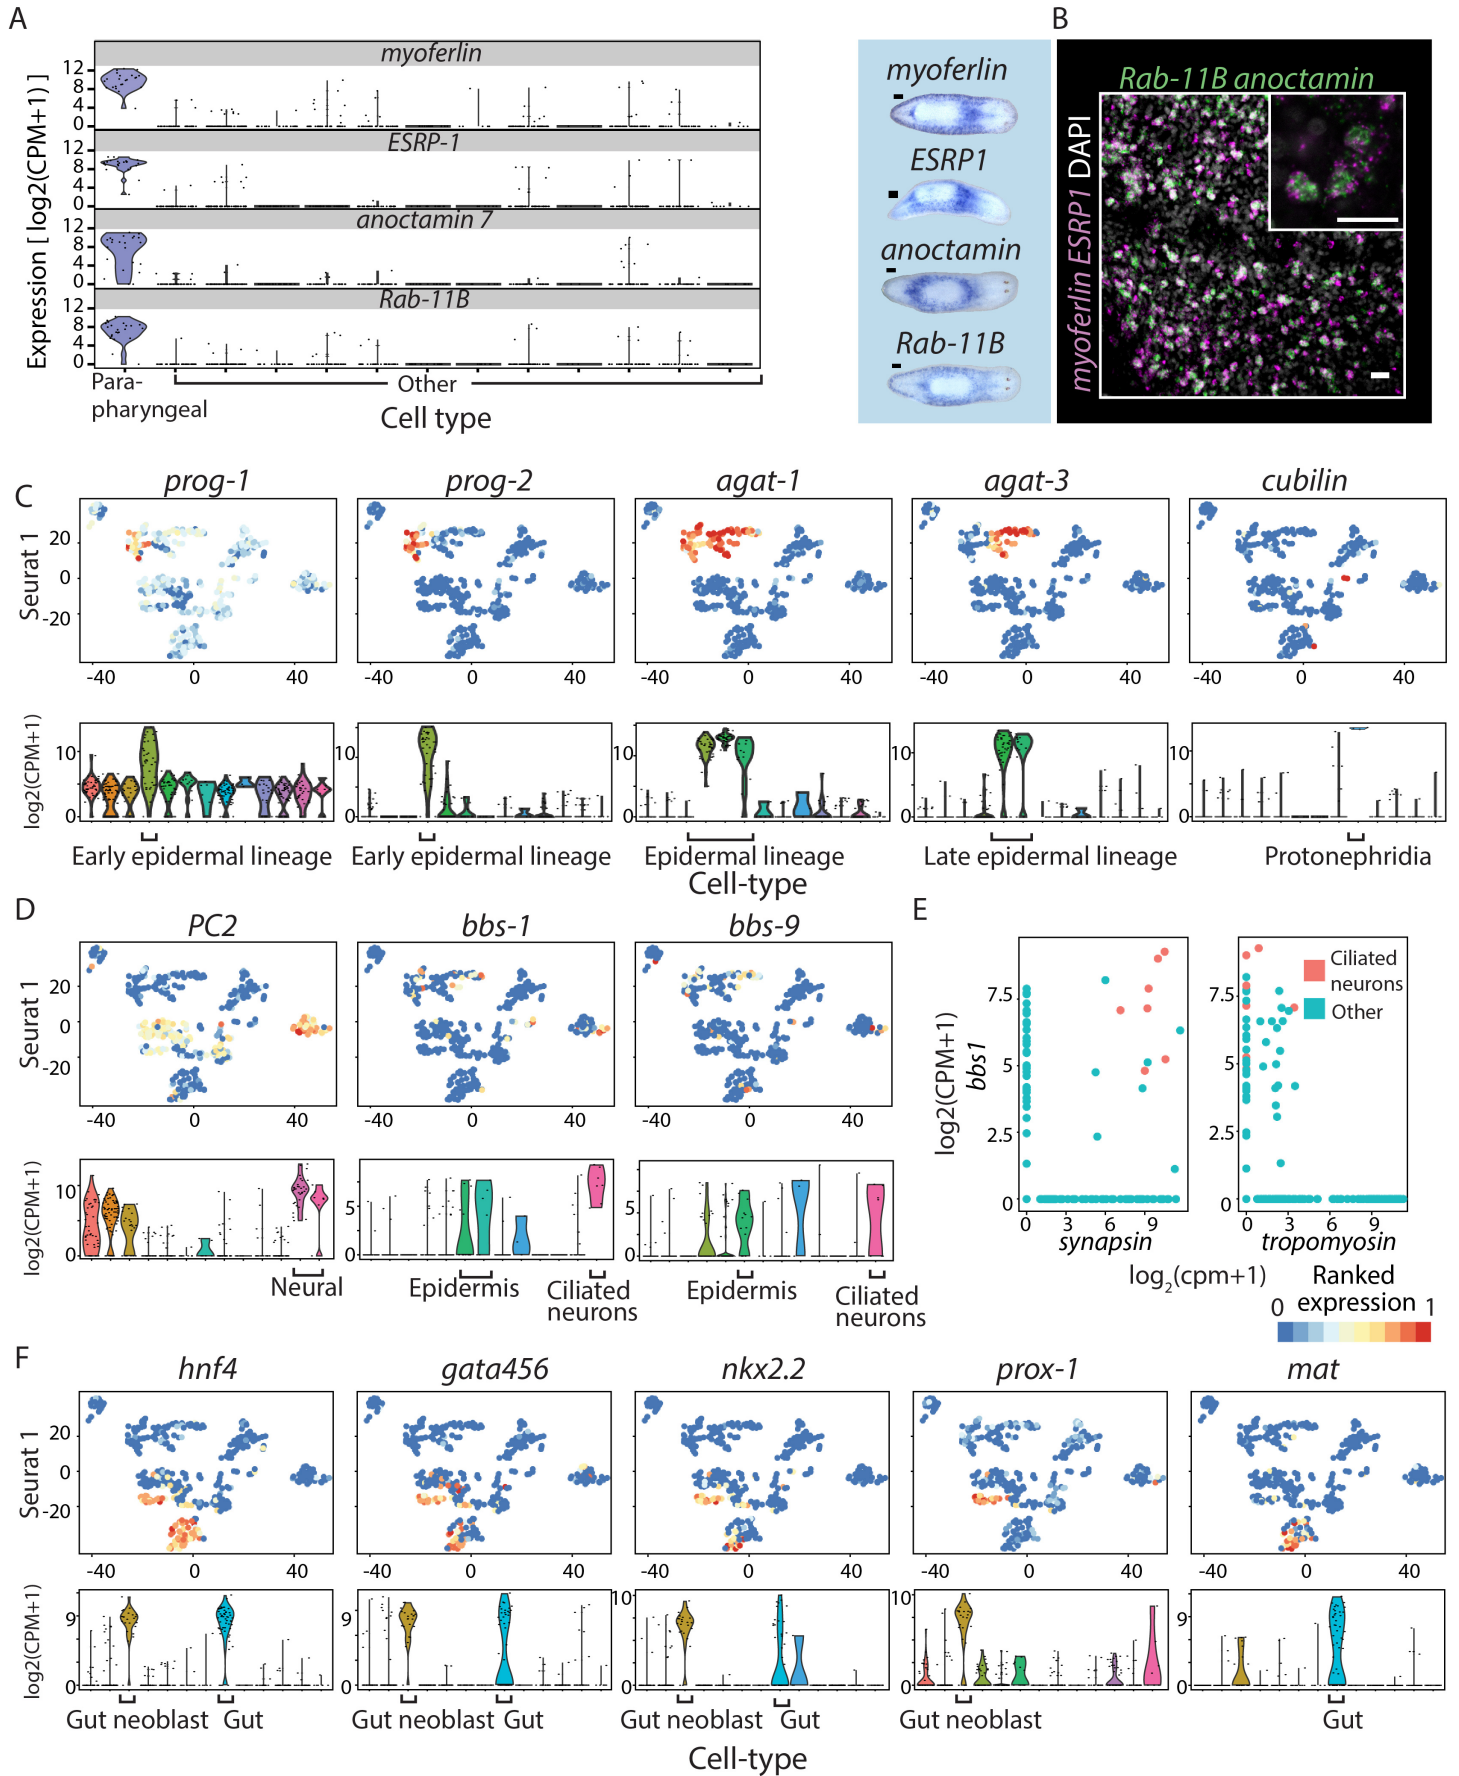

**Figure S2, related to Figure 1. Single cell gene expression planarian resource.** (A) Left panel: violin plots show high specificity to a single cluster (violet; black dots represent single-cell expression). Right panel: WISH analyses of the genes reveal, in all cases, a parapharyngeal localization (scale = 100  $\mu$ m). (B) dFISH of genes enriched in the parapharyngeal cluster. Pooled probes for *myoferlin* and *ESRP-1* (magenta) and *Rab-11B* and *anoctamin* (green) were used for coexpression analysis (scales = 20  $\mu$ M; DAPI in gray). (C) Upper panel: Expression of cell type specific markers plotted on *Seurat* maps showing the specificity of genes to cell types (Cells represented by dots; color is the ranked expression of the gene in cells. blue to red, low and high ranked expression, respectively). Lower panels: Violin plots of gene expression across cell-types. X-axis annotation highlights cell types enriched for the plotted gene. (D) Upper panels: *Seurat* maps of the canonical neural marker *PC2*, and two canonical cilia components (*bbs-1* and *bbs-9*). The components are expressed almost exclusively in differentiated epidermal cells and in a subset of the neural cells (*PC2+ / synapsin+*). Lower panels: violin plots of neural (*PC2*) and cilia (*bbs1* and *bbs9*) related genes. (E) Left panel: Co-expression plots of *bbs-1*, a cilia component, and *synapsin*, a canonical neural marker, shows that a subset of the cells expressing high levels of *synapsin* also express *bbs1*. Right panel: Co-expression of *bbs-1* with *tropomyosin*, a canonical muscle marker, shows that there are no cells highly expressing both genes (cells represented by dots, red and blue colors are cells determined to be ciliated neurons, and other cells, respectively). (F) Upper and lower panels: *Seurat* maps and violin plots of putative gut neoblasts markers, including transcription factors and gut markers. The expression of *hnf4*, *gata4/5/6*, *nkx-2.2* appears in both the differentiated gut cluster, and the gut ( $\gamma$ ) neoblasts. The transcription factor *prox-1* is expressed the gut neoblasts cluster, but not in the differentiated gut cells. *mat*, a planarian gut marker, is expressed exclusively in the differentiated gut marker.

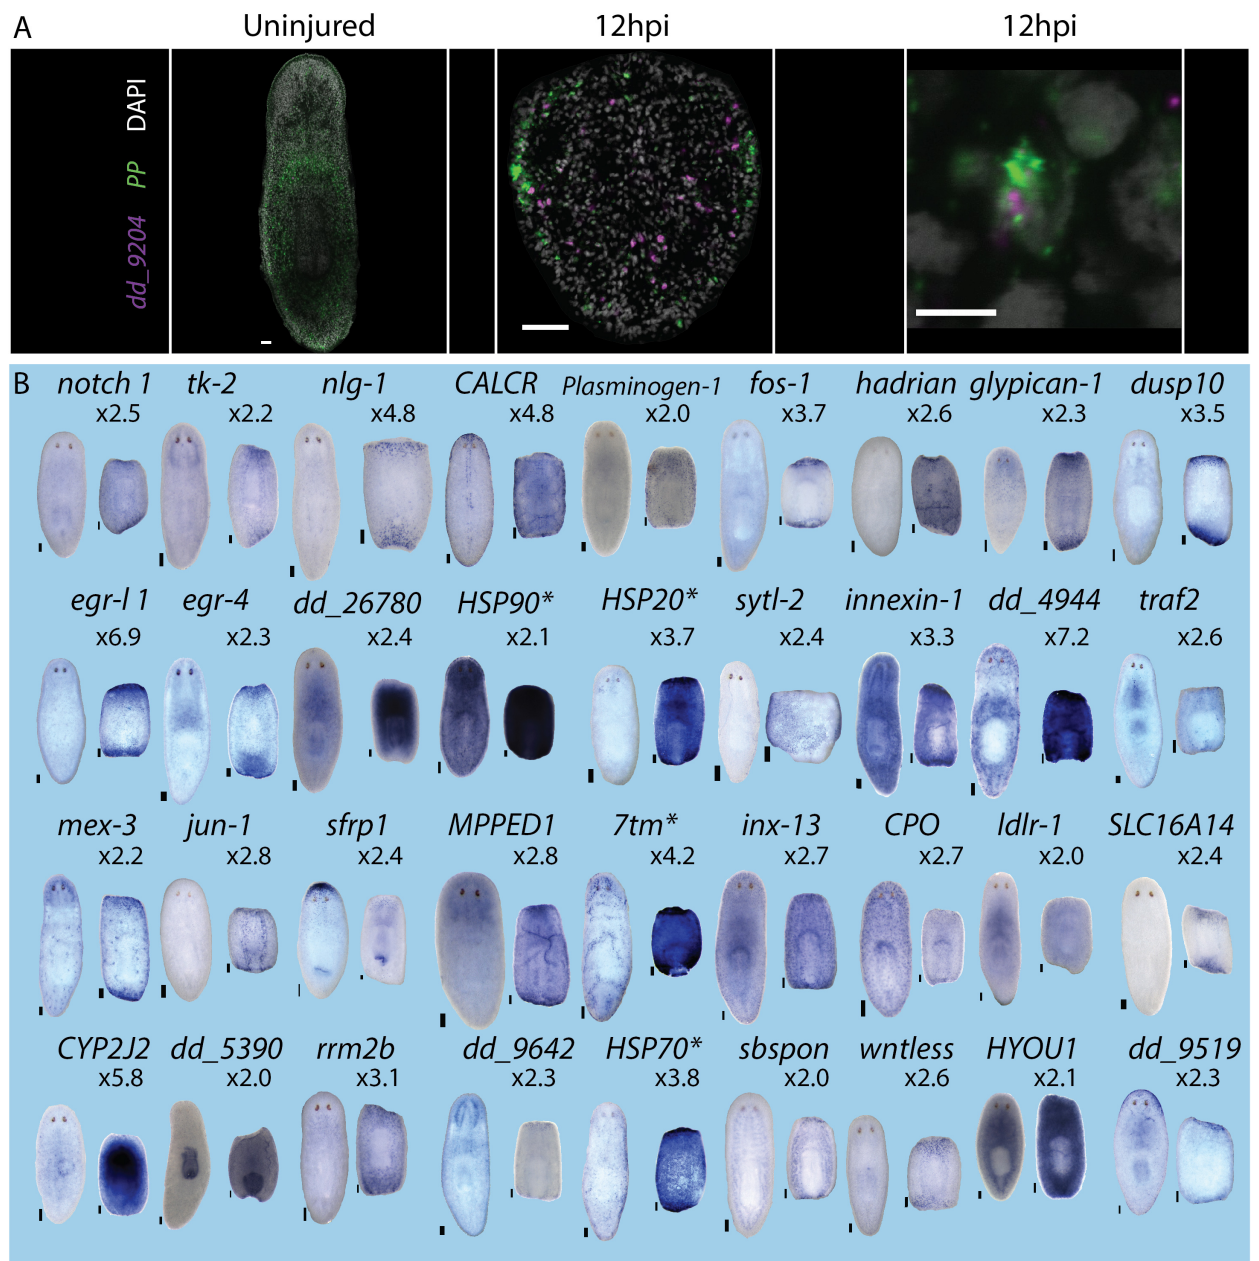

**Figure S3, related to Figure 4. Wound induced gene expression.** (A) dFISH validation of parapharyngeal-specific gene expression of *dd\_9204* (magenta) with a parapharyngeal probe pool (*myoferlin* and *ESRP1*; green) and DAPI (gray) in intact and injured (12 hpi) animals. Scale = 50  $\mu$ m; right panel scale = 5  $\mu$ m. (B) WISH analysis of 36 additional genes tested for asymmetry in expression of wound-induced genes. Shown are intact animals and trunks. \* denotes annotation based on protein family domains (PFAM; Methods). Scale=100  $\mu$ m.

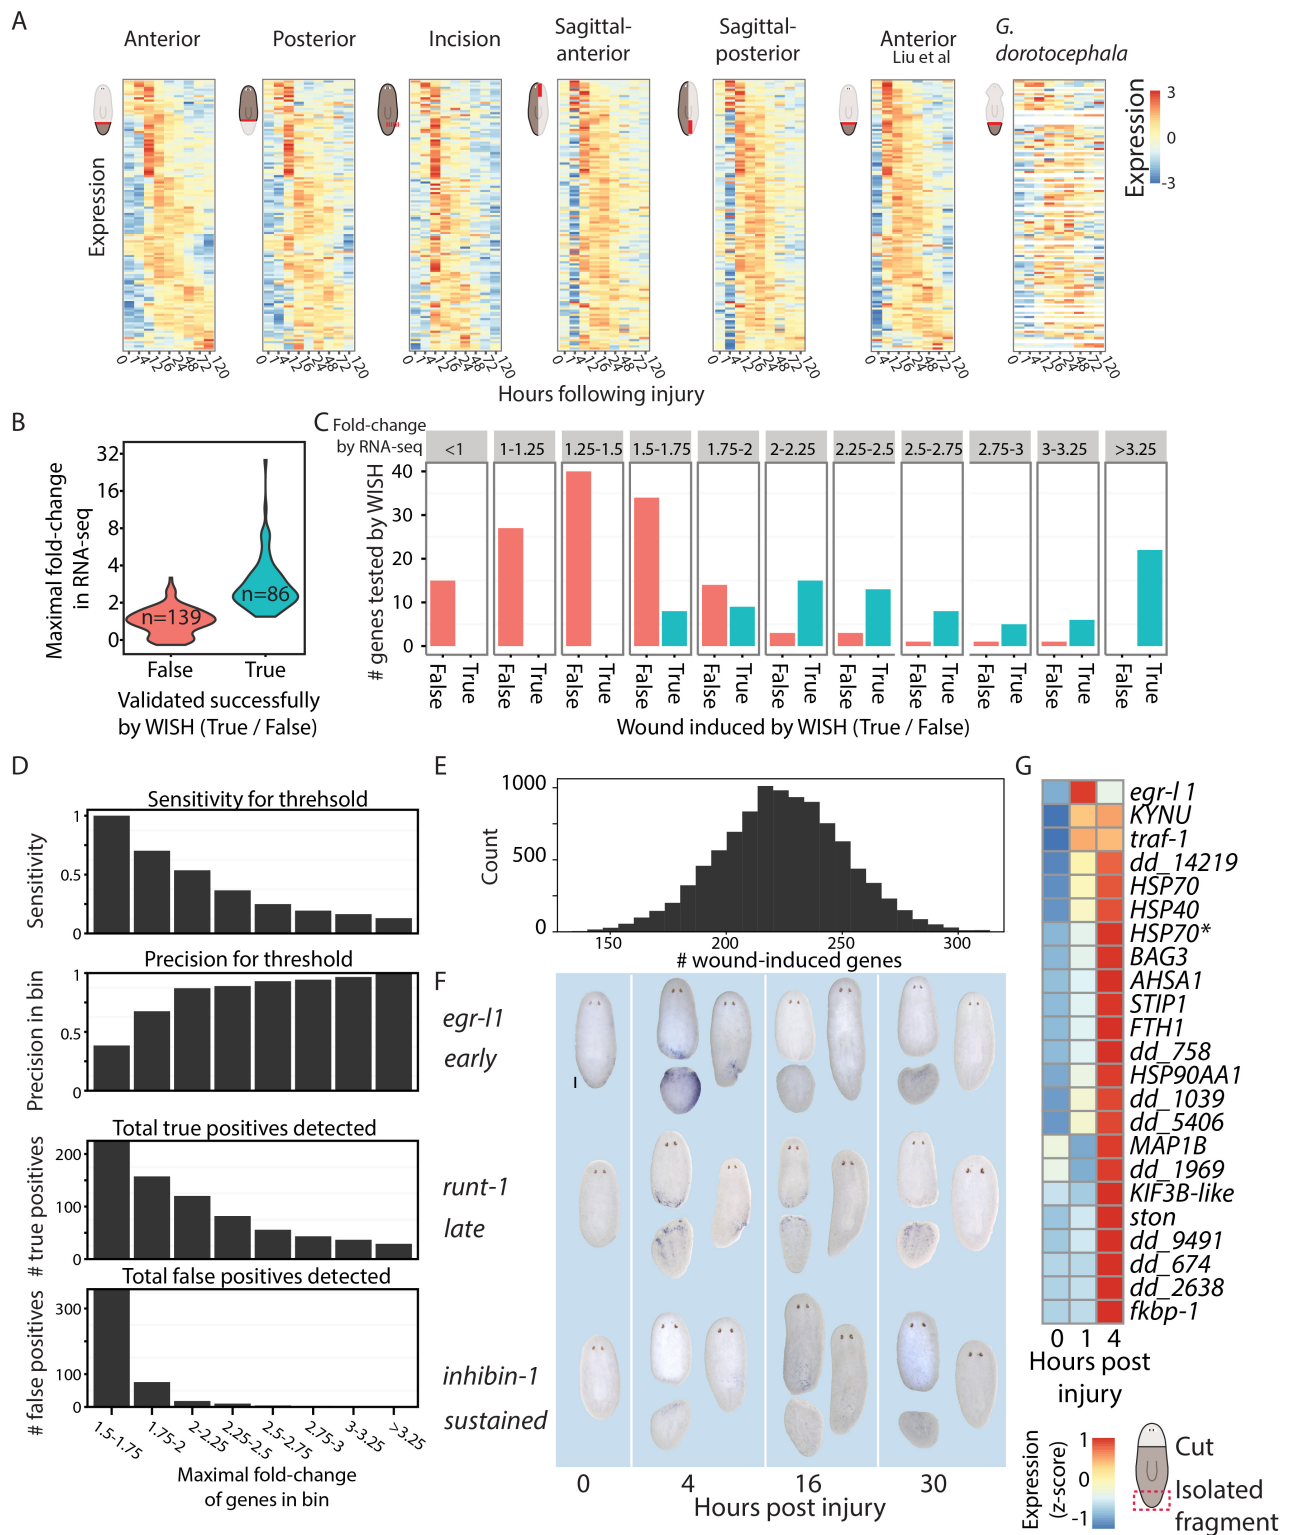

**Figure S4, related to Figure 5. Extended time course analyses of distinct injuries.** (A) Shown is the expression of 128 wound-induced genes in extended time-courses from multiple injuries. Each row represents a gene, and columns represent the time of isolation (hours post injury; 0-120 h). The colors are z-transformed value (minimal and maximal range was set to -3 and 3, respectively; blue, yellow and red colors correspond to low, medium, and high



expression, respectively). The ordering of the genes is identical in all heatmaps to facilitate comparisons, and furthermore, it is identical to the gene order in figure 5A. The rightmost heatmap presents regeneration timecourse from *G. dorotocephala*. Gene ordering of the orthologs found in *G. dorotocephala* for the 128 wound-induced genes, was retained. In case no ortholog was found, a blank line was plotted. (B) Violin plot summarizing the WISH analyses performed to estimate the sensitivity and precision of RNA-seq for detecting wound-induced genes (n represents the number of WISH analyses in the group it is plotted in). (C) Shown are bar-plots summarizing the number of true positive and false positive found through WISH analyses grouped according to their maximal change in expression (top title, linear scale) up to 12 hours from amputation (Sampling performed at 0, 3, 6, 12 hpi in anterior and posterior amputations; Methods). (D) Summary of key parameters of false-discovery, sensitivity, and precision, obtained through comparisons of RNA-seq and WISH analyses. Shown are bar plots comparing different groups of genes tested by WISH that were binned by their maximal expression induction following wounding. Shown are estimates for the total number of true and false positives in each bin, through multiplying the sensitivity and precision by the total number of significantly overexpressed genes (FDR < 0.05). (E) Estimation of total number of wound-induced genes in the planarian genome by resampling analysis (n=10,000; extended experimental methods). (F) Shown are the full WISH images corresponding to the fragments displayed in Fig 5E. (G) Heatmap of wound-induced genes that were found by analyzing tissues far from the wound site (row z-score; Table S4).

## Extended experimental procedures

### Gene cloning and transformation

Genes were amplified from planarian cDNAs using gene-specific primers and cloned into pGEM vector according to the manufacturer's protocol (Promega). Vectors were transformed into *E. coli* DH10B by the heat-shock method as follows: 20-100  $\mu$ l of bacteria were mixed with 10  $\mu$ l of pGEM vector cloned products and incubated on ice for 30 minutes, and then put at 42°C for 1 minute. The mixtures were then supplemented with 100  $\mu$ l of SOC medium and following 1 h incubation at 37°C, were plated on agarose plates containing 1:500 carbacyclin, 1:200 Isopropylthio- $\beta$ -D-galactoside (IPTG), and 1:625 5-bromo-4-chloro-3-indolyl- $\beta$ -D-galactopyranoside (X-gal). Colonies were grown overnight at 37°C and white colonies were screened by colony PCR using primer sequences M13F (GTAAAACGACGGCCAGT) and M13R (CAGGAAACAGCTATGAC) with the following PCR program: a. 5 minutes at 95°C; b. 34 cycles of 45 sec at 95°C, 60 sec at 55°C, and 2:30 minutes at 72°C; c. 10 minutes at 72°C; d. hold at 4°C. Reactions were analyzed by gel-electrophoresis and for each gene a colony showing the correctly sized gene product was transferred to Luria Broth media (LB) supplemented with 1:500 carbacyclin for overnight incubation at 37°C. Plasmids were purified from overnight cultures with the QIAprep Spin Miniprep Kit (CAT #27106; Qiagen). Cloned genes sequences were validated by Sanger-sequencing (Genewiz, Inc.).

### Double-stranded RNA synthesis for RNAi experiments

Double stranded RNA (dsRNA) was synthesized as previously described (Petersen and Reddien, 2008). Briefly, PCR templates of sequences for the forward and reverse of the target genes were prepared with a 5' flanking T7 promoter (TAATACGACTCACTATAGGG). The forward and reverse templates (4  $\mu$ l) were mixed, in separate reactions, with 16  $\mu$ l of 10 mM rNTPs (Promega); 1  $\mu$ l of 100  $\mu$ M dithiothreitol (DTT; Promega); 1  $\mu$ l of thermostable Inorganic Pyrophosphatase (TIPP; New-England Biolabs); 0.5  $\mu$ l of RNasin (Promega); 1.5  $\mu$ l

of T7 polymerase; and 6 ul of 5x Transcription optimized buffer (Promega). Reactions were incubated for 4-12 h at 37°C and then supplemented with RNase-free DNase for 45 minutes. RNA was purified by phenol extraction followed by ethanol precipitation, and finally resuspended in 30 ul of MiliQ H<sub>2</sub>O. RNA was analyzed on 1% agarose gel, and quantified by Nanodrop (ThermoScientific) to have at least 5 ug/ul. RNA for forward and reverse strands were combined and annealed by heating the reactions in a thermo-cycler to 90°C and lowering gradually the temperature to 20°C.

### Planarian dsRNA feedings

Animals were starved for at least 10 days prior to the first feeding. dsRNA was mixed 1:3 with 100% homogenized beef liver, and supplemented with 1 ul of red food coloring.

Animals were kept in dark for at least 2 h before feeding, and were then taken out of the dark and fed the dsRNA-liver mix for at least 2 h. Animals uptake of the food was evaluated by the red coloring of the gut branches. Following a feeding, the culture plates and water were replaced and worms were kept in the dark; water in plates was replaced the day following a feeding as well, and every 3 days, unless another feeding was done.

### RNAi feeding protocol

Worms were fed with liver containing dsRNA every three or four days. Three days following the fourth feeding animals were cut to three fragments, and the trunks were immediately soaked in 100 ul of planarian water supplemented with dsRNA against the target gene for 6 hours in the dark. Then, animals were washed and trunks were kept in the dark for 9 days before being fed with liver containing dsRNA against the target gene (booster). Then, 3 days following the booster feeding, trunks were cut to 3 fragments and soaked in planarian water containing dsRNA for 6 hours. Regenerating fragments were screened for defects every other day.

## ILLUMINA LIBRARY PREPARATION FOR ANTERIOR AND POSTERIOR TIME-COURSES

Control prepharyngeal fragments (0 hpi) were isolated in biological triplicates and placed in TRIzol Reagent (Life Technologies) within 5 minutes from tissue isolation. Anterior-facing or posterior-facing wounds were amputated as pre-pharyngeal fragments as follows: A first cut was done either in the anterior or posterior end of the pre-pharyngeal region, and, at a given time-point (3, 6, or 12 hpi), a second cut was done to the opposite end of the pre-pharyngeal region. Prepharyngeal fragments were placed in biological triplicates in TRIzol (Life Technologies). Total RNA was purified following manufacturer's instructions (Life Technologies), followed by a second chloroform extraction to remove residual phenol contamination. Libraries (total 21) were prepared using the TruSeq RNA Sample Preparation Kit v2 (Illumina) and were sequenced on Illumina HiSeq 2000 sequencer (Illumina).

## ILLUMINA LIBRARY PREPARATION FOR FAR LIBRARIES

Animals were amputated prepharyngeally and were placed in planarian water. Following a recovery period (0, 1, or 4 h) tail fragments were isolated and put immediately in TRIzol (Life Technologies). Total RNA was purified and sequencing libraries were prepared using the TruSeq RNA Sample Preparation Kit v2 (Illumina).

## ILLUMINA LIBRARY PREPARATION FOR EXTENDED TIME COURSES

Tissues were isolated and placed in TRIzol (Life Technologies) for RNA extraction as previously described (Liu et al., 2013). Briefly, animals were cut as: postpharyngeally for (1) anterior- and (2) posterior- regeneration time courses; sagittally for (3) anterior and (4) posterior sagittal time-course; a postpharyngeal incision for the (5) incision time-course; and postpharyngeal amputation on *G. dorocephala* for (6) anterior regeneration. Then, animals were put in planarian water for recovery. At each of the time points (1, 4, 12, 16, 24, 48, 72, 120 hpi) at least 8 animals were killed in 1% HCl for 1 minute, followed by 2 washes in

phosphate buffered saline (PBS). Animals were then put in RNALater (Life Technologies) and wound-sites were isolated on a cold block and put immediately in TRIzol as previously described (Liu et al., 2013). Uninjured fragments were isolated similarly, with the exception that the animals were killed and put in RNALater before isolation of the desired fragment. RNA was extracted according to manufacturers' instructions following tissue lysis in TRIzol with TissueLyser II (Qiagen; 2 minutes at 20Hz, followed by 2 minutes at 30Hz). RNA concentration was measured with Qubit 2.0 Fluorometer (Life technologies). At least 500 ng of purified RNA was used for strand-specific Illumina RNA-sequencing library construction as previously described (Engreitz et al., 2014; Schwartz et al., 2014). Briefly, for each sample poly-adenylated RNA was purified by two rounds of polyA selection (Dynabeads mRNA Purification Kit; Life Technologies) and eluted in 18 ul of H<sub>2</sub>O. RNA was then fragmented with RNA Fragmentation reagent for 2 minutes (AM8740; Ambion) and purified on paramagnetic beads (Dynabeads Silane MyOne; Life Technologies 37002D). Then, RNA was incubated with 2U of Turbo DNase (Life Technologies) for 30 minutes followed by addition of FastAP for 10 minutes (Life Technologies). Then, RNA was ligated with an RNA oligo corresponding to a truncated 3' Illumina adapter (AGAUCGGAAGAGCACACGUC; IDT) using T4 RNA ligase 1 (36 units; NEB), and reverse transcribed with a specific primer (AGACGTGTGCTCTCCG; IDT) with AffinityScript reverse transcriptase (Agilent). Following cDNA synthesis, primers were removed by adding ExoSAP-IT (Affymetrix) directly to the mix. RNA was degraded by adding NaOH, and cDNA was isolated and eluted in H<sub>2</sub>O by paramagnetic beads clean-up. The 3' of the cDNA was ligated with a truncated 5' adapter (AGATCGGAAGAGCGTCGTGTAG; IDT), and the cDNAs were amplified for 12 cycles with barcoded Illumina primers.

### Sequencing read mapping

Sequencing reads from each library were mapped to the *S. mediterranea* dd\_Smed\_v4 transcriptome assembly (Liu et al., 2013) with 5 additional sequences (sequences listed below) using Novoalign v2.08.02 with parameters [-o SAM -r Random]. The resulting

Sequence Alignment/Map files (SAM) were converted to sorted BAM format with the samtools v1.1 (Li et al., 2009) command [samtools view -T dd\_Smed\_v4 -bS IN | samtools sort - OUT] where dd\_Smed\_v4 is the fasta file of the assembly (<http://planmine.mpi-cbg.de/>), IN is the name of the SAM file, and OUT is the name of the sorted BAM file.

Mapping statistics for each library were calculated by the samtools flagstat, and were examined manually. Read count per contig was calculated by bedtools v2.20.1 (Quinlan and Hall, 2010) using the coverageBed command [-abam IN -b BED > OUT] where IN is an input sorted BAM file; BED is a bed formatted file with all contigs in the assembly and their lengths; and OUT is the resulting read-counting coverage file.

### Detection of differentially expressed wound-induced genes

Coverage files from the high-resolution wound-response time courses (0, 3, 6, and 12 h following anterior or posterior amputation) were consolidated to a read count matrix. The expression matrix was filtered for contigs longer than 450 base-pairs (bp). Following TMM data-transformation with edgeR v3.6.8 (Robinson et al., 2010), low expressing contigs were filtered with a cut-off of CPM of 6 in at least 2 out of 21 libraries. Next, differentially expressed genes were determined by the exactTest function by comparing each time point in the two time courses, separately, to the expression at time 0. Following hypothesis testing the p-values were corrected for multiple testing with false discovery rate (FDR). FDR smaller or equal to 0.05 and a fold-change of 2 or more were set as thresholds for determining wound induction. Genes that were found to be upregulated in at least one time point were included in the wound-induced genes list, except for contigs dd\_Smed\_v4\_9491\_0\_1, dd\_Smed\_v4\_14725\_0\_1, and dd\_Smed\_v4\_1071\_0\_1 that were not validated by WISH (Table S3).

### Detection of genes with putative asymmetric expression

Expression levels of wound-induced genes were compared between matching time points in the anterior and posterior time courses using the edgeR exactTest function. Genes with

corrected FDR of 0.1 or less, or exhibiting a fold change of at least 1.5 were selected for WISH validation, as well as 50 additional wound-induced genes exhibiting smaller differences in expression or less significant FDR between injuries. WISH validation of the genes was done on (i) intact animals and (ii) trunks of amputated animals that were cut and subsequently fixed at the time-point exhibiting the largest difference in expression between anterior and posterior wound sites.

## Estimating the sensitivity of the wound-induced gene detection

Recent surveys of wound-induced gene expression in planaria yielded very partially overlapping results (Kao et al., 2013; Sandmann et al., 2011; Wenemoser et al., 2012), reflecting different instrumentation, analytical methods, and experimental setup. WISH was performed on 225 different genes on intact and amputated animals that covered a wide range of expression changes and FDR following wounding, including 46 negative controls (fold change; FC; and FDR, 0 to 28.6 and 0 to 1, respectively; Fig S3B; Table S5). 38% (86/225) of all of the tested genes were detectibly wound-induced by WISH. None of the genes with maximal FC less than 1.5 (n=82) could be validated by WISH regardless of their FDR. Furthermore, genes with maximal FC between 1.5 and 2 could be called with a precision of only 26% (17/65; Table S4; Fig S4B-D). By contrast, 88% (69/78) of the genes with FC > 2 could be validated by the WISH analysis (Table S4-5; Fig S4B-D). Therefore, 2-fold overexpression in at least one time point following wounding was used as a threshold for calling wound-induced expression. This threshold balanced sensitivity (57%) with precision (88%) compared to alternative thresholds (Fig S4C-D). Estimation of the total number of wound-induced genes was done by sampling 50% of the differentially-expressed genes according to thresholds [FC > 1.5; FDR < 0.05; minimal CPM 6 in at least 2 libraries] 10,000 times. For each sample the total number of wound-induced genes was estimated by multiplying the number of genes in an expression bin by the fraction of genes that were wound induced, as detected by the WISH validated genes in the sample. Estimations were

multiplied by 2 to correct for the sample size. The total number of wound-induced genes was the average of the individual estimations.

### Single-cell isolation and Fluorescence-Activated Cell Sorting

Wound sites were collected from post-pharyngeally amputated animals 4-6h or 12-14h following an amputation; control cells were collected from the same region in intact animals and were processed immediately. Cell suspension was prepared and was subjected to FACS as previously described (Hayashi et al., 2006; Reddien et al., 2005). Briefly, isolated tissues were put in 450 ul of CMFB (calcium magnesium free buffer + 1% BSA) with 50 ul of collagenase and incubated at room temperature while gently pipetting the samples. Samples were then filtered through a 40 um filter into CMFB. Samples were spun down and re-suspended in 500 ul of CFMB. To each sample, 20 ul of Hoechst was added and incubated in the dark for 45 minutes, followed by addition of 1 ul of propidium iodide. Negative controls devoid of either Hoechst, PI, or both were prepared in parallel. Single cells were sorted to 96-well microplates containing 5 ul Buffer TCL (Qiagen) + 1% 2-mercaptoethanol. Plates were incubated for 5 minutes at room temperature and were then placed on dry ice.

### Single-cell sequencing library construction

RNA-sequencing libraries were prepared from Single sorted-cells as previously described (Picelli et al., 2013; Picelli et al., 2014) with few modifications. Each well in a 96-well microplate was supplemented with x2.2 (11 ul) of Ampure XP beads (Agencourt) and incubated for 10 minutes at room temperature, and then put on a 96-well magnet plate (Dynamag 96-side magnet; Life Technologies) for 5 minutes. Supernatant was removed and beads were washed twice with 100 ul of 80% EtOH. EtOH was removed and beads were air-dried for 10 minutes before elution of the beads in a mixture of 1 ul of reverse transcription primer (5'-AAGCAGTGGTATCAACGCAGAGTACT(30)VN-3', IDT DNA), 1 ul of dNTP mix (10 mM), 0.1 ul of SUPERase RNase-inhibitor (40 U/ul; Life Technologies #AM2696), and 1.9 ul of H<sub>2</sub>O. The plate was incubated at 72°C for 3 minutes and placed immediately on ice. Each



well was supplemented with 7 ul of a mixture consisting of 1.65 ul H<sub>2</sub>O, 2 ul of 5x Maxima reverse-transcription buffer (Thermo-Fischer), 0.9 ul MgCl<sub>2</sub> (100mM Sigma-Aldrich; M1028), 2 ul of Betaine (5M; Sigma-Aldrich; B0300-5VL), 0.25 ul of SUPERase RNase-inhibitor (40 U/ul), 0.1 ul of Maxima RNase H- RT (200 U/μL; Thermo-Fischer, EP0753), and 0.1 template switching-oligo (Exiqon; 100 uM; AAGCAGTGGTATCAACGCAGAGTACrGrG+G; r and "+" denote RNA and LNA bases, respectively). Plate was briefly span-down and incubated as follows: 42°C for 90 minutes, followed by 10 cycles of (50°C for 2 minutes, 42°C for 2 minutes), followed by 70°C for 15 min. Following reverse-transcription a pre-amplification mix of 14 ul was added to each well [1 ul of H<sub>2</sub>O; 0.5 ul of PCR primer (10 uM; 5'-AAGCAGTGGTATCAACGCAGAGT-3'), and 12.5 ul of KAPA HiFi HotStart ReadyMix (Kapa Biosystems; KK2601)]. The cDNA was amplified using the following program: 98°C for 3 min; 20 cycles of (98°C for 15 sec, 67°C for 20 sec, 72°C for 6 min); 72°C for 5 min; hold at 4°C. Following pre-amplification PCR products were purified using x0.8 Ampure XP beads, and eluted in 20 uL of H<sub>2</sub>O. Amplified cDNA concentrations were measured using Qubit HS-DNA reagents (Life Technologies). Samples were diluted to 0.2 ng/ul, and sequencing libraries were prepared using the Nextera XT library kit (Illumina). For each sample, 1.25 ul of amplified cDNA was combined with 2.5 ul of tagmentation DNA buffer and 1.25 ul of the amplicon tagmentation mix. Samples were mixed and put at 55°C for 10 minutes. Samples were chilled on ice, and 1.25 ul of neutralize tagment buffer was added for 5 minutes incubation at room temperature. An amplification mix was added as follows: 3.75 ul of Nextera PCR mastermix and 1.25 ul of two barcoded amplification primers. The samples were amplified with the following PCR program: 72°C for 3 minutes; 95°C for 30 seconds; 12 cycles of (95°C for 10 seconds, 55°C for 30 seconds, and 72°C for 1 minute); 72°C for 5 minutes; hold 4°C. Following amplification, 2.5 ul of each sample were pooled in groups of 32-96 samples, purified with x0.9 Ampure XP beads, and eluted from beads in 25-50 ul of H<sub>2</sub>O.

## Single-cell data mapping and clustering

Following Illumina sequencing, cells were eliminated from further analysis if they were found to be contaminated by more than 25% of non-planarian DNA, as detected by mapping to human, mouse, rat, yeast, and *E. coli* genomes. The sequencing reads from all other cells were mapped to the dd\_Smed\_v4 assembly (Liu et al., 2013) with Novoalign v2.08.02 and the number of reads for each contig was calculated as described above. Following mapping, reads mapped to contigs dd\_Smed\_v4\_10881\_0\_1 and dd\_Smed\_v4\_5614\_0\_1 were excluded, as they represented misalignments of primer amplification sequences to the planarian transcriptome. Samples having reads mapped to less than 1,000 or more than 9000 contigs were eliminated from subsequent analyses. Data was analyzed using the single-cell analysis Seurat method (Satija et al., 2015). Briefly, genes showing CPM expression of more than  $2^4$  and a dispersion of 1.5, were selected for initial PCA. Next, principal components that significantly separated cells were determined by a jackstraw analysis (Chung and Storey, 2015) by running the function `jackstraw [num.pc = 15, num.replicate = 100, prop.freq = 0.03]`. Based on the analysis PCs 1 through 4 were selected, and the list of genes used for the Seurat analysis was expanded by using the function `pca.sig.genes [pcs.use = c(1:4), pval.cut = 1e-5]`. Then, a second round of PCA was performed with the expanded list of genes, and a jackstraw analysis determined the significant genes in each PC by running the `jackStraw` function `[num.pc = 15, num.replicate = 100]`. The top 50 genes contributing to the variance in PCs 1 through 15 were examined manually to identify technical biases (Satija et al., 2015). PC 3 was eliminated from gene selection because most of its highly variable genes consisted of ribosomal proteins, which indicated that it represented technical difference between cells. Dimensional reduction was performed by t-SNE using the `run_tsn` function `[pcs.use = c(1:2, 4:12), max_iter=500, perplexity=20]`. Cells were clustered together by the `Mclust_dimension` function with parameters `[reduction.use="tsne", G.use=3.2, set.stat=TRUE, MinPts=3]`. Clusters 5 and 14 were

eliminated since they grouped cells suffering from low complexity, based on number of expressed genes. Cell-specific markers were found by using the `find_all_markers` function with parameters [`thresh.test=4`, `test.use='roc'`, `return.thresh=0.7`]. Clusters having the same markers were merged [9 and 24; 4, 5, and 20; 7 and 8; 12, 19 and 23; 13, 16, and 10; 19, 21, 22, 25, and 27; 2, 6 and 26. Cluster 6 cells showing high expression ( $\text{CPM} > 1024$ ) *prog1* and *prog2* (Eisenhoffer et al., 2008) were consolidated with cluster 18].

## Detection of differentially expressed genes between clusters

Differentially expressed genes in clusters were detected by running the Seurat

`find_all_markers` function [ `thresh.test=2` ] and area-under-the-curve for each gene was

calculated with `find_all_markers` [`thresh.test=2`, `test.use='roc'`, `return.thresh=0.5`]. In

addition, clusters expressing the same canonical cell-type markers (e.g., *smedwi-1* or *synapsin*) were temporarily merged, as they might reflect functional relationships of

different clusters (e.g. subtypes of a major class of cells). Genes enriched in the merged

clusters were found by comparing them to all other clusters by running `find.markers` [`stat.1`

= MERGED, `stat.2` = OTHER ] where MERGED stands for the merged clusters and OTHER

stands for cells that were not in the merged clusters. P-values were corrected using the R

function `p.adjust` with default parameters.

## Detection of cell-type-specific wound-induced genes

Cell-type-specific wound-induced genes were determined by three analyses. First, the gene

expression of wound-induced genes from cells derived from intact animals was compared

with the gene expression of cells from wounded-animals using the bimodal expression

hypothesis testing with parameters [ $\text{FDR} \leq 1\text{E-}7$ ] (Shalek et al., 2014). Second, gene

expression of cells from the wounded time-points was contrasted between a cell type and all

other cells with the following parameters pairs using the bimodal expression hypothesis

(McDavid et al., 2013) [ $\log \text{FC} \geq 2$ ,  $\text{FDR} \leq 0.001$ ;  $\text{FDR} \leq 1\text{E-}7$ ]. Finally, adjacent clusters on the

t-SNE plot were combined, and the hypothesis testing was repeated. Particularly, late

epidermal lineage and epidermal cell-types were combined; neuronal types; and neoblast subpopulations.

## Clustering of unwounded 4C isolated cells

Expression matrix from uninjured neoblasts (n=90) was generated. The *Seurat* method was applied with the following parameters [min.cells = 10, min.genes = 4000, calc.noise=FALSE, is.expr=0.01, do.scale = TRUE]. Cells expressing more than 9000 genes were discarded from further analysis. Gene selection was performed as previously described with the following parameters: mean.var.plot [ y.cutoff = 1.5, x.low.cutoff = 5 ]; jackstraw [num.pc = 6, num.replicate = 100, prop.freq = 0.03]; pca.sig.genes [pcs.use = 1, pval.cut = 1e-3]; run\_tsne [pcs.use = c(1,2,3), max\_iter=500, perplexity=23]; Mclust\_dimension [G.use = 25].

## Transcriptome assembly of *G. dorotocephala*

Sequencing reads from all samples from *G. dorotocephala* were combined. Adapter sequences were trimmed with trimmomatic (v0.30) (Bolger et al., 2014) with the following parameters [LEADING:3 TRAILING:3 ILLUMINACLIP:TruSeq2-PE.fa:2:40:15 SLIDINGWINDOW:4:15 MINLEN:30]. Reads containing long stretches of polyA or polyT (>20 nt) were removed using a grep command. Assembly was performed with trinity (release r20131110) (Haas et al., 2013) with the following parameters [ --seqType fq --JM 100G --output dor\_PE --CPU 6 --min\_contig\_length 200 --SS\_lib\_type FR ]. Redundant sequences were detected and removed by running cd-hit-est (v4.5.4) (Fu et al., 2012) on the output file with default parameters. Orthologs with *S. mediterranea* were identified with proteinortho (Lechner et al., 2011) with parameters [ -p=blastp+ -e=1e-7 -cov=0.35 -pairs -singles].

## Detection of onset and offset of wound induction

Expression data from each time course were used for fitting by the *impulse* model (Chechik and Koller, 2009; Chechik et al., 2008) using a published Matlab implementation (Sivriver et al., 2011). Fit for each wound-induced gene was produced for function fit\_impulse\_params\_constrained [expression [ log2(CPM+1 )], retries=100, time points = (0,

1, 4, 12, 16, 24, 48, 72, 120) for all time courses except for the head regeneration time course by Liu et al (Liu et al., 2013) that lacked 1 hpi time point and was called with (0,4,12,16,24,48,72,120)]. Internally, the fit function was called with constraint parameters [t1 ≥ 0; t2 ≥ 0; h0 ≥ 0; h1 ≥ 0; h2 ≥ 0; β1 ≥ 0; β2 ≤ 0]. Expression values for every time point within the 0-120 hpi range was extracted using the impulse function [fit parameter output, time point 0-120]. Genes used for onset of anterior regeneration analysis were collected from previous publications (Gurley et al., 2010; Reddien, 2011; Scimone et al., 2014; van Wolfswinkel et al., 2014; Vogg et al., 2014), and filtered for extremely lowly expressed genes [ minimal expression 2 and standard deviation of 0.3 ]. A median group fit was produced by using median z-score values in each class [Genes associated with specialized neoblasts, patterning factors, and differentiated tissue markers] and a using baseline value for the three classes at 0 h time point as -1.5; to allow convergence 4 hpi samples were corrected by subtraction of 0.05-0.1, as for regeneration related genes their expression was almost identical to the 12 hpi gene expression. Fit function was called with constraint parameters [t1 ≥ 0; t2 ≥ 0; h0 ≥ 0; h1 ≥ 0; h2 ≥ 0; β1 ≥ 0; β2 ≤ 0]. Following filtering the following contigs were used for *S. mediterranea*: dd\_Smed\_v4\_11372\_0\_1, dd\_Smed\_v4\_11521\_0\_1, dd\_Smed\_v4\_13056\_0\_1, dd\_Smed\_v4\_13215\_0\_1, dd\_Smed\_v4\_13898\_0\_1, dd\_Smed\_v4\_14611\_0\_1, dd\_Smed\_v4\_14633\_0\_1, dd\_Smed\_v4\_15104\_0\_1, dd\_Smed\_v4\_15144\_0\_1, dd\_Smed\_v4\_15178\_0\_1, dd\_Smed\_v4\_15253\_0\_1, dd\_Smed\_v4\_15516\_0\_1, dd\_Smed\_v4\_16375\_0\_1, dd\_Smed\_v4\_17385\_0\_1, dd\_Smed\_v4\_17726\_0\_1, dd\_Smed\_v4\_17731\_0\_1, dd\_Smed\_v4\_21717\_0\_1, dd\_Smed\_v4\_21801\_0\_1, dd\_Smed\_v4\_856\_0\_1, dd\_Smed\_v4\_9774\_0\_1, dd\_Smed\_v4\_9893\_0\_1, dd\_Smed\_v4\_11285\_0\_1, dd\_Smed\_v4\_12674\_0\_1, dd\_Smed\_v4\_13487\_0\_1, dd\_Smed\_v4\_13985\_0\_1, dd\_Smed\_v4\_15531\_0\_1, dd\_Smed\_v4\_19866\_0\_1, dd\_Smed\_v4\_5102\_0\_1, dd\_Smed\_v4\_6604\_0\_1, dd\_Smed\_v4\_8832\_0\_1, dd\_Smed\_v4\_11968\_0\_1, dd\_Smed\_v4\_12112\_0\_1,

dd\_Smed\_v4\_12647\_0\_1, dd\_Smed\_v4\_12653\_0\_1, dd\_Smed\_v4\_14207\_0\_1,  
dd\_Smed\_v4\_16476\_0\_1, dd\_Smed\_v4\_16581\_0\_1, dd\_Smed\_v4\_17854\_0\_1,  
dd\_Smed\_v4\_20433\_0\_1, dd\_Smed\_v4\_29533\_0\_1, dd\_Smed\_v4\_3135\_0\_1,  
dd\_Smed\_v4\_6710\_0\_1, dd\_Smed\_v4\_8392\_0\_1. Orthologs were identified for *G.*

*dorotocephala* as described above and the following contigs were used:

comp14905\_c0\_seq1, comp25657\_c0\_seq1, comp28223\_c0\_seq1, comp28241\_c0\_seq1,  
comp28262\_c0\_seq1, comp28562\_c0\_seq1, comp28762\_c0\_seq1, comp29894\_c0\_seq1,  
comp29915\_c0\_seq1, comp30125\_c0\_seq1, comp30289\_c0\_seq1, comp31066\_c0\_seq1,  
comp31293\_c0\_seq1, comp31342\_c0\_seq1, comp31414\_c0\_seq1, comp32324\_c0\_seq1,  
comp37945\_c0\_seq1, comp3844\_c0\_seq1, comp4224\_c0\_seq1, comp5212\_c0\_seq2,  
comp8621\_c0\_seq1, comp8817\_c0\_seq1, comp27033\_c0\_seq1, comp27221\_c0\_seq1,  
comp27470\_c0\_seq1, comp28896\_c0\_seq1, comp3788\_c0\_seq1, comp4439\_c0\_seq2,  
comp5124\_c0\_seq1, comp5348\_c0\_seq1, comp7983\_c0\_seq1, comp17302\_c0\_seq2,  
comp25468\_c0\_seq1, comp29782\_c0\_seq1, comp29980\_c0\_seq1, comp31706\_c0\_seq1,  
comp32106\_c0\_seq1, comp43392\_c0\_seq1, comp5522\_c0\_seq1, comp6277\_c0\_seq1.

## Primers used in this study

| Contig               | Primer A                | Primer B                 | Primer C                 |
|----------------------|-------------------------|--------------------------|--------------------------|
| dd Smed v4 10259 0 1 | ACGCAGAGGCTTGCA GTT     | TTGGTCTGTGTGCAGCCA       | GCCACAAATGACACCGCA       |
| dd Smed v4 10337 0 1 | AAAAGACGCGATGAGGCA      | TGTCCTTTGCAATTTATTCGCGA  | CAGCCAGGTACAGTGGC        |
| dd Smed v4 1039 0 1  | TGTTTCGATTTCTAGACGAACCG | TTGGCCGGAATATCTCATCA     | GCATCACCACCTTCCACAGG     |
| dd Smed v4 1054 0 1  | CCGGAATTCACGGGCCAA      | TGTAGAATGACTCGAATCTCGGA  | TTGAGTGTCCGCTGCTCG       |
| dd Smed v4 10569 0 1 | CGCGTTCCCAATGACAGC      | TGAAGGCGGTGTTCTTGAC      | ACAGATAACCTGCAAGATCCT    |
| dd Smed v4 10584 0 1 | CCGCCGTACAGTATCATGGA    | ACCAATAGAGACAGTTCAGCCA   | ACGAAATTGACAACGCTAGTGA   |
| dd Smed v4 10624 0 1 | ACGAGCCAATGTCCAGCC      | TATGTGTTTACGAGTGCATTTTT  | CACCGGGTGACGCATGAA       |
| dd Smed v4 1071 0 1  | ACGGGTCGACGTGAGTTG      | TGCAACACAAATCGTAAACAGA   | GTCCTGACGCACGAGGAA       |
| dd Smed v4 10716 0 1 | CGGTGAGCGGTGTGTGAT      | TCGATTTCAAGTTCATTTGTGGA  | TCCCGGCATACAAGAGCAC      |
| dd Smed v4 10730 0 1 | GCAATCAGCCAACCTCGGG     | TTTATTAAGAACCAGAAAGCGT   | TGGGGTGCCGGATACAGT       |
| dd Smed v4 10776 0 1 | GACATTTGGCAGTCCCTTCCTG  | CGAACTTGCTCCCGGACA       | GGGGTATCTGATTATGACTGAGC  |
| dd Smed v4 10868 0 1 | TTGGGCTGCGGGATTTGG      | GGAGCATTGATAAGTTGTCTGT   | TCGGCAACAACTCCTCGA       |
| dd Smed v4 1087 0 1  | ACCAGAACCGGAAGCTCC      | TGTCGCTTCAATAAAGGCAAA    | TGTTTGCTCACGTCTCTCC      |
| dd Smed v4 10927 0 1 | ACAACGAATGGCAGAGTGAGT   | TTTTGGAGTGTGTATGCATGAGA  | CAACGCAGAGTTCTGTCAAAA    |
| dd Smed v4 10930 0 1 | ACCAAATTCATGCAAGTCGTT   | ACACAGTGTTTTGGTTTCCACC   | TGCGGCATTATATTTGCGGA     |
| dd Smed v4 11074 0 1 | CCGGCTGGTCTGTGCGAG      | TCAATGAACATTATGGTCCCACC  | CTCCCCGCATCGAAAGCA       |
| dd Smed v4 11115 0 1 | TGCCTAGAGACGACTGCTCT    | TGCATTGAAATTCGCCTTTGGT   | TGCGGTGCTTGCTCATGA       |
| dd Smed v4 11134 0 1 | GGCCTTCTTAGCGATGCGA     | ACTCTGCTCCACCACACAG      | CTGGCGCTGACAATCCGA       |
| dd Smed v4 11142 0 1 | AGGCTTCACTGTCGGTTCG     | TGTCCATGTGTTACCAGTCA     | TGTGACTCTGCGCTGACG       |
| dd Smed v4 11216 0 1 | CTCGAGCTGACGCGGAAA      | TGACTGCGTCCATAGTGTGA     | TCTCCAAGGGGTGCACT        |
| dd Smed v4 11220 0 1 | AGGAACTTGAGGACATTTCCGC  | GTTCTTCGGATAATGTCCACCT   | CAAATTTTCAATCCATCCCGACA  |
| dd Smed v4 11254 0 1 | TTCAATTTCAATCAGCATGTGG  | TGACATTTTCGATCGTTGCGT    | ATATCCTTGCTTTGTACTACTGA  |
| dd Smed v4 11501 0 1 | TGTCGCTCAATATGCAGGCT    | TCGTGCTAACTTCCAGGGA      | AATTCGACTTGCGGTGCC       |
| dd Smed v4 11512 0 1 | AACTCGTCTGTGCTGCGA      | TCCCAGCGACATGATTGGT      | TGGTGGGACATTCATAATGGC    |
| dd Smed v4 11561 0 1 | TGGCAACTGCATTGGGA       | CAACGAAAATCCCTCTAGCTCC   | TCAAAGCTGCTTCGGGGG       |
| dd Smed v4 11608 0 1 | GGCCGATCAGTGCACCTT      | ACGGAGAAATGTCCCAGG       | CGACTTGATGGGCCACA        |
| dd Smed v4 11629 0 1 | TGCTTCCATGCGCGGA        | GCTCCACATCCAAATGGGC      | CCACATGCCATAAACACCCG     |
| dd Smed v4 11635 0 1 | GAGTGATCTAGCGATTTGATTGG | TCCTCGATGCCTATGGAACT     | ATTTTGCAATAGGCCCATCAGT   |
| dd Smed v4 11693 0 1 | CAGTGGATGGTTGCCGGT      | AGCTGATCCAGAAATGCCTAA    | TAGACGGGCTGTTCCGGT       |
| dd Smed v4 11824 0 1 | TGCTCTGTGGCACTGACG      | TGTGAGAAACGCTACGATCAA    | ATGTCGCTTCCACCGTC        |
| dd Smed v4 11858 0 1 | TCACAGAAAACCCAGTCCCC    | TGCAGTTTCAACAAAAGATTCTT  | ACTATTTGCTTCAATGAGCAGACA |
| dd Smed v4 11943 0 1 | ACACCATTCCATACGCCGA     | TCCAATAACTCGAGCAATATGGT  | TTGATTGAGGCCGCTGCA       |
| dd Smed v4 12081 0 1 | TGGAAACCAGGGGGCTTT      | TGTCATCGTTTACTGTGGCT     | ACGGTAAATGTGCGATGAACG    |
| dd Smed v4 12210 0 1 | TCGACGCAGATTAGAACT      | CCAATACACAAGCTTATGACACG  | GGAATGGCTGTTCCGGGT       |
| dd Smed v4 12467 0 1 | GCAGTTTGCATCTGTATTGC    | TTGGAATCGACTGACGGAAG     | TGGGTTTGCTGTAATTGGCA     |
| dd Smed v4 12472 0 1 | CCGTTTCGATTATGCGGCC     | CTCTGTACGGATATTTCCAATCA  | CGTCACGCAATTCGACCG       |
| dd Smed v4 12575 0 1 | CCCCTCTACGAGAAATTGCTGT  | TGGGCTAGCTTAATACTTTGCA   | TCCGAGAAGGCCAATTCGG      |
| dd Smed v4 12619 0 1 | AGCATGTCAGGAGCTCGA      | ACAATTACCACATCAATGGGACA  | GGCTTTGGTTTAGGCTTTGGT    |
| dd Smed v4 12634 0 1 | GCAGGTCTTGAGGCAGCT      | CCTGTCCATATAACTGGAACA    | TGTATCAGGGCAAACGAGTT     |
| dd Smed v4 12695 0 1 | CCATCGAGACCGGTTGA       | CAAAATCGGTTTCGGAAAGTTTCA | TCCGCTGCTGTTTGTCTGT      |
| dd Smed v4 13056 0 1 | ACAGTGGGCGATTTTCTCCT    | TCTATGGATTCCCCGAAGTCC    | TGACACCAAGGTTGAGGCA      |
| dd Smed v4 13061 0 1 | TGCAAAACAATACTAGCCAATGC | TGCGAAAGTTGTATCAATCCGT   | TCGATGAAGTCATATTTCCCGT   |

|                      |                         |                          |                          |
|----------------------|-------------------------|--------------------------|--------------------------|
| dd Smed v4 13186 0 1 | TCCCTGCCATTAGTACGACA    | AATAGATCCGGATGAATTGCTTG  | AGGAAAAGGGGAGGGCC        |
| dd Smed v4 13188 0 1 | ATTGAAATTTCTTCACTGACGCT | TGTACTIONTCTATCGCTTGCA   | GACTCTAAAATGGATGCCGAGC   |
| dd Smed v4 13216 0 1 | AAACTGCCGCGACGAAGA      | TGTTTGGTGAATGTTAGAGCAA   | CGGCGGACTATGACCTCG       |
| dd Smed v4 13318 0 1 | CAAGTGGTGTACATTTTCAGCA  | TCAAAGGCCAAATTTCTGCCT    | TGACATCAATTAGCCCTGGAAA   |
| dd Smed v4 13356 0 1 | TCCAACCTGAACCATGTCGGA   | GTCCAATTCGATTGTGAACCGA   | TGTTGCAGTGGGGCTCAG       |
| dd Smed v4 13468 0 1 | TCCAAGTGGATTTCGGGCA     | TGGACGAAAATGACAATTTCTCCT | AGGAGCATTGTCGTGGCA       |
| dd Smed v4 13487 0 1 | ACGCGTGACTIONGAGTTGGT   | TCGGACTACCCCATTTGCAG     | TGATTGTTGAGATTGGCGAGT    |
| dd Smed v4 13835 0 1 | TGACTGCCAGTGTGTTATCAGA  | ACACGAATTGGTTGGATCAAACC  | TCCACAGAATTGCGAATCCCA    |
| dd Smed v4 13843 0 1 | GTAACCGGGACCTCGCCA      | AGAAAGTTCAACGCAAGATCAGT  | TGTCGAATCTTGCGCCCA       |
| dd Smed v4 13860 0 1 | CGGTTGATCTGCAATACCGC    | CGTTCTCGATTGTGATAGAAAGG  | TGTTGGTCAGATACAAGTGCGA   |
| dd Smed v4 13985 0 1 | TGACCAAGATTTTCCCTAAGT   | TCATTGGAGATTGGCAAGCA     | GGCAGACCGATTGTGGGT       |
| dd Smed v4 14011 0 1 | ACTTCTCAACTGTTCAAAATGCA | TTCACTTCGGCATTTGCAACT    | AGGTTTAAAACAAAAGCTGCCT   |
| dd Smed v4 14068 0 1 | TTTGGAACATTTTACGAGAACCG | ACTATAGCGGAAGTTTAAATCGGA | TCTTAAACAGCTACATGTGCAAGA |
| dd Smed v4 14158 0 1 | GCCGAATGTTTCAATCAAACCG  | TGTCATTTTTCAGTAAAAACGGCA | TCGAAAAATTTGCCGACAAGA    |
| dd Smed v4 14199 0 1 | GCCTTAATCGACGTGTTTGGGA  | CGGTTCTCAGATTCGGAGA      | TCTTGTTCAAAACGGAGGAACA   |
| dd Smed v4 14370 0 1 | TGATGCGGCTATTGTTGATTTT  | TGCGCTTCCATTTTACCAGC     | ACTGTTACGCAACAAAATAAGGT  |
| dd Smed v4 14391 0 1 | GGCTTCAAAGGCCACGGT      | ACCTTTGCTGACAGGAGATGG    | CCTCGTCATCAAGTCGTCGA     |
| dd Smed v4 14392 0 2 | TGTCTCAAACAGAAGTTCGTCAG | TCGTCGATTGAAAAGAAATGACCT | GATGGGCGGCCGTATGAA       |
| dd Smed v4 14656 0 1 | TCGACCCGAAAATGTGTTTGC   | TGTTTCAGACCCAAGCTACCG    | ACCATTTGAAAACGTTTCAAGTT  |
| dd Smed v4 14711 0 1 | TCAGACTGGATATACCCCATTCG | TGCCGGGAATTCATGAATCG     | ATGATTTTGTCTGAAATGTGCGCA |
| dd Smed v4 14725 0 1 | CCCATTGTCTTTTATGCAAGGCT | CAGAAAAATGCAGGAGCTCTGA   | GCCAGCCATTTTCAGCGAC      |
| dd Smed v4 15035 0 1 | CGCTGATTCCCAAGCGGA      | TGCACTCACTAAAGGTACAGAA   | ACAACACGAATTTGTGCAAAACA  |
| dd Smed v4 15386 0 1 | CGGCCGAAAGAGTCTCCA      | CCGATTGACAGTGCATATCA     | CGCTGTCCGGTGTGTGCGA      |
| dd Smed v4 15499 0 1 | TGGTTTAGATGCGGTTCCAT    | GCCCTGTAGAAAATTTATCCCGA  | TGCTTCGCAGCCTACGTC       |
| dd Smed v4 15531 0 1 | GTTGGCCTCTCATCCAGCA     | TCCGACAATTATCCGCCTGA     | CCCTGTTACCGAGCCTGAC      |
| dd Smed v4 15647 0 1 | TCACTTATAAAGGCCGCCCA    | TTTGCTTCTAGATGAGGTCTGCA  | CAAAGCCCACCACTCGAGA      |
| dd Smed v4 15715 0 1 | TGTGAACTGTAACTTGTCTG    | TGATTCTCCATCTCTAGACTCCA  | AAACCACTACGTTCCCAAACA    |
| dd Smed v4 15787 0 1 | GCCATCCCAGATGCCTCC      | TGCCAGCATTACCACAGATT     | ACGGCTGCTTTGACCTCC       |
| dd Smed v4 158 0 1   | TGCTGCAACTTCTTCGCA      | GCCTCTTCAATAACTTCAGCAGC  | CTCCGCTGATCAATCACCGA     |
| dd Smed v4 1580 0 1  | GTTGGTGAAGGCCATCCAGA    | AGTGATGCCATTCTAGATGCACA  | TGAGGCACTTGCTGAACGT      |
| dd Smed v4 1581 0 1  | CTCGGACTTGGGTCTGCC      | AGGAAACGATCGTGGATGACT    | GGTCACACTCTCTGCACGT      |
| dd Smed v4 16092 0 1 | TGCCGAAAACGCAAGCA       | TGCAGTAGACTCGAAACAAA     | ACCAAAGCAGGAGAGGAAGG     |
| dd Smed v4 16209 0 1 | TTTGCAGGCTTCGACCAA      | CTGTTTGGATTTCTGTGGCGA    | GTCTTCGACCGCAACACA       |
| dd Smed v4 16222 0 1 | CCAGCGATTAATTGTGTCGAACA | CGGTTCAACGGTTTCAGCA      | TGATTTCTTTTACGGGGCTCCT   |
| dd Smed v4 16227 0 1 | GGTCGGTTTTTCCATCGTGG    | AGCTCTCAACCTCAAGATCTACA  | CGTCGACGCTTGTGAGGT       |
| dd Smed v4 16605 0 1 | TTGGCTTTACGTTGGCATTCT   | CTTTCATGTGATTTGGCTGTGAT  | AGTCGAAGTGGTCAACGCA      |
| dd Smed v4 16842 0 1 | AGCGTCCCTTTCGAGACA      | CCTCAACTCCAAATGCTAAAACA  | GGACCAGCTCATGACCCG       |
| dd Smed v4 17385 0 1 | TGGAACGCTATAAGTCCGGTGA  | TGGCGGTTACATTTCCA        | TCGGACCGATTGAAGCGT       |
| dd Smed v4 17402 0 1 | CGGATAGCGAATACAATTGATGC | ACTCACACAATAATTGATGCCA   | CCATCGGGAAGCAATTGTCC     |
| dd Smed v4 1771 0 1  | TTCTTTTACACCGTCTTTGT    | TTGTCCACCAATGGATATCCCG   | TCCATATGTTATGAATGGAGGCA  |
| dd Smed v4 17726 0 1 | GCAAGAAAACCGGACGGG      | CGAGTGATCCTGGAAACATTGC   | ACTCCGGAGCGAGACCAT       |
| dd Smed v4 1846 0 1  | ATGGAACCGCAGCAAGCT      | TCAAATGTGGCATGGATTTTCGT  | GTCGACAGGGCCACTTGT       |
| dd Smed v4 18818 0 1 | GCGCTTGTTAATCTGGTCCC    | AAGAGTGAAATCAAATCGCGT    | TGGAAAACCGACTACAATTCCA   |
| dd Smed v4 1921 0 1  | TTATCGGCAGTGTGCCCC      | TCCTTTATTTTGGCGAGGCA     | ACTATGGAGCAATACCGAGGA    |



|                      |                         |                          |                         |
|----------------------|-------------------------|--------------------------|-------------------------|
| dd Smed v4 19428 0 1 | CCGAAGACGATTGCAACGT     | TGCCATCGGAATTACAGGCT     | ACAGTTAGGCCATACTCAAATGA |
| dd Smed v4 19592 0 1 | ACTCGGGTTTAAATGCACCAC   | ACCAGTGTGACTATCTTTTGTGC  | CGGCATTGGCTGCTTCT       |
| dd Smed v4 19826 0 1 | CGACAATCGGCCTGAGGT      | TGACATATTCGAAAACCAACCTC  | AATGGGAATCACGGCGCA      |
| dd Smed v4 1986 0 1  | GCCGCTGGATCTTTTGGCA     | TCGCATAGCGGGATCACT       | AGATCCGCGCTTTTGT        |
| dd Smed v4 1999 0 1  | TGATCGCCACTCCGAACG      | CCTGATCGAAGCAGTTCAGAG    | TGTCGTAGGAGGACGCCA      |
| dd Smed v4 20048 0 1 | TCATCGGAAAATCACCTGCT    | ATCAGAAACCTGTCCAATGGT    | TGTCAGGCTGAATGGTCGG     |
| dd Smed v4 20122 0 1 | ATTACTTCCGCCGAGAGAAGT   | TCATTGGAAATCGACATGAGACA  | AGTCATTTTCAACATGAACGGCG |
| dd Smed v4 20133 0 1 | CGGCCGATCTCAGCCAAT      | GGATTGAAAGCCGCGAAATCA    | GCTTCAACAACGCGTCCA      |
| dd Smed v4 20318 0 1 | TGAATGCCCAATGGTCGCA     | TCGAAGAGAGAGTAGAACGAGC   | TGGACGCAAGCACTGTCC      |
| dd Smed v4 21069 0 1 | TGTGGCAATTGCATGGTGT     | TGGCTGAAACAAGTCAAATCCG   | CGACAAGTCGCAACATTTGT    |
| dd Smed v4 21717 0 1 | TGACCACTTCATCTGTTGACA   | AGGGCCAAAGAAGAAGCCG      | AGTGACATGGAAATGGACCT    |
| dd Smed v4 2172 0 1  | AGAAGGAATCGGACTGTTTGG   | TGAGAGACCAAGTGACAAAGAA   | TGGAATGGCCAAGGCAGA      |
| dd Smed v4 22031 0 1 | TCGTTTCTTGGGCAGTCGA     | ACTCTCTCAGCAATTTTGTAGTGA | TGCGGCTGTGGGTAAAA       |
| dd Smed v4 22061 0 1 | AGATTTTACATATGTTGCCCTCG | TCGATGTCTCCTTCATCAGACG   | AACTTTGACACAACCACAAGAGA |
| dd Smed v4 22479 0 1 | TCACAGCGATGTGGAAGACA    | AGCAACAATCCAGAACTCGA     | GGAGCGGAAGGGAGGAGA      |
| dd Smed v4 22918 0 1 | TCAAGTTGCGAGGCCCTTGT    | TGCCAAATATGTACAGCAACGA   | AGCCTAATGAATGAGTCGAAAGT |
| dd Smed v4 2324 0 1  | GCGCCACCCTGTATCGA       | CAGCTATCAGATGGTCAAAGTCA  | GTGTGCTGGACCTGCT        |
| dd Smed v4 23420 0 1 | TCCAACCTGTGTAATGGGGTGA  | TTCTTTGAAAGTTGCGTCCCG    | TCCTCACAACAAGAAAACGGA   |
| dd Smed v4 23666 0 1 | TCTCCAACAATCTCCATCCGT   | TCGGCTTTGGAAAACCGA       | AGGAATCTACCGAAATCCTTCAA |
| dd Smed v4 2394 0 1  | TGGAATGCCAACATTTTCTCAA  | GAACCCCTCAAGATACCATGACA  | GCGAATAAAAGGAAGTACTGAGC |
| dd Smed v4 24180 0 1 | TGAATGATCCGCAATCCAGT    | AACGTTCTGCTGCAATGACG     | TGAGATACCCAACGATTTGCGCA |
| dd Smed v4 2442 0 1  | GCTCACTGAGTTTGCCTATGC   | TGACAAGTCTTCCAGAAATCCT   | GGTTTCAATGATCATTGTTGGCG |
| dd Smed v4 246 0 1   | TGCACACAACCTCATGAGCA    | GGTAGATCGTTCTGCAATGCA    | AGTTGAACCTCCAGACAACACA  |
| dd Smed v4 2575 0 1  | TGGAAATTCGCATTGTTGTTGT  | TCTGCAGTCTCGCCGAT        | TGTCATATCACTCAAGTCTGACA |
| dd Smed v4 2582 1 1  | TCCAAGGAGGGAATGGTGG     | TGTACACGAACCTGGGCGG      | ACGACAAGATAACCCTCACA    |
| dd Smed v4 2588 0 1  | ATGGCAGCCGGTGTGTT       | AGCTATGCGAGGAAACTATTGA   | TCAAATCCCAATCTGTATCGT   |
| dd Smed v4 26705 0 1 | TGCCTTCTTTTTCGGTGG      | TCATGTTTGTCTTTTGTCAACGA  | GGTACTTAATGACAGTTGCAACT |
| dd Smed v4 26780 0 1 | TCGAGTTTTCCCATGTTGTGAC  | TGTGTCGTGGTTGCTTCC       | CAAACGGTAAATTTGCCAAGAGA |
| dd Smed v4 2679 0 1  | ATATCGGTCAGGCTGGCG      | TGCTGGGAGTTGACTGTCT      | CCTCATCTTCGTTATCGTCTTGA |
| dd Smed v4 2789 0 1  | ACTCGAAGCGGAAGAAGTGG    | CCAATCATAACTGCGTCATCACA  | TCTCTGTACACACGCGCG      |
| dd Smed v4 28398 0 1 | CGTCAATCATCTCAGAAACACCA | CAATATGCTTTCACCAGACACCA  | TGACATTCAACTTTGCAACACCA |
| dd Smed v4 2844 0 1  | TCAGCAGCAGCAGCATGT      | CCGCTGCTGATGCCACTA       | AGCAAACGCGCGATGTAGA     |
| dd Smed v4 28487 0 1 | TGTTGGTGGTCTGTTTGGTCT   | TGCCATTTTGTGTGCT         | ACAGTAATCGATTGGAGTTGG   |
| dd Smed v4 30088 0 1 | TCTGTACGGTGTGTTTGT      | ACAGCAGTTGATTATCAAGGCG   | TCAGCCAATGGAAAATCAGTTGA |
| dd Smed v4 3012 0 1  | CTCGTCTCGCAAGCGTCA      | ACAAGCTCCATATGGAAGAGGC   | CGGCATTGCTGCTGTGA       |
| dd Smed v4 3040 0 1  | TGAAGGACGAATGTGACGGT    | TTCTCGGTTTATTGTTGGACAAC  | AGCTTGTATGGCGCTACACA    |
| dd Smed v4 30891 0 1 | TCGGGCAGCTTCCTTGTCT     | AGGTCCATGTGCAATGTGGT     | TGTAAGCACATTGAGTTACAGGA |
| dd Smed v4 31236 0 1 | TGCTTGGCCTTGTGCGTCT     | TGGTTAAGCATTCTGTGGGTC    | GGCGACATGACATCGTCTCT    |
| dd Smed v4 320 0 1   | TGAACCAACAGCTGCTGCT     | CGCTGAACGCAATGTGTT       | CAGCCCTCCTGGTCTCT       |
| dd Smed v4 3257 0 1  | GCGACGTCATTAAGAAGCTAGTG | GATGCAGTGTAGTGAATAATGTCA | ACTGTTTGGCACGCGAGGA     |
| dd Smed v4 3259 0 1  | ACAACGCTTCCATCAACAACA   | TCCTCACCTTCATCATCTTCGA   | TGGCAGTGTCAAAAGTACAC    |
| dd Smed v4 3269 0 1  | TGCAGTTTCTCAATGTGATGACT | AGAATCGCAAGGAGTTGGTGT    | CCCATCAGTCTTAGATCGGC    |
| dd Smed v4 32934 0 1 | AAAGACGACGAAGGGCGC      | TCCATCATGCAGAAAGTCCGGT   | AGGCTTCCAAATCTTTTCTGTG  |
| dd Smed v4 33456 0 1 | TCCGACTCAGTTCATGACCA    | CTCTTGAACATCTTTGCCAGGA   | GCTCGGAGCGAATGGAAA      |

|                      |                         |                          |                         |
|----------------------|-------------------------|--------------------------|-------------------------|
| dd Smed v4 3362 0 1  | AATGTGTGGTCATTGGGGATG   | TGCAGTTGGGAAAACATGCA     | CAAACTTTGTGCGTTTCCGT    |
| dd Smed v4 345 0 1   | CGGCGAGTATAAATCGGGGG    | ACAAAATGCAATTCAACATGCAA  | TCCGTTCTTTTGGATCATGGT   |
| dd Smed v4 3541 0 1  | AAATGACGGATTTTCGCGCC    | GCTCAGCTCACATATTGCAGG    | ATTCAATGTGGGAAATTTGCACA |
| dd Smed v4 3603 0 1  | GCCGCACTAGAGTTGGCA      | AGCGAGCGATGTTTATGAAAAGG  | AGTGCCACTTCGTGAGCC      |
| dd Smed v4 3606 0 1  | ACTCTTAATTGTCGCGTTTGT   | AGAATTGACTGAACTCGGAAAGA  | AGGTTTCATCATAGCATTGGCCA |
| dd Smed v4 3632 0 1  | CGTGCTGCGTTTCTTCGG      | GCGAAACTTCTGGTGATTGCA    | GCACATTTTGTGTCACAGCA    |
| dd Smed v4 3638 0 1  | TCCCAAACACTTTGCCAACA    | ACAGAAGAACTTTTCCCTGCA    | TCAGGAAACCGAGGATAAAACT  |
| dd Smed v4 3667 0 1  | CGTCTCCGAGTGGCTGG       | GGCGAGACACTGAGCTCG       | GACCACACGTCCGCCTTT      |
| dd Smed v4 3674 0 1  | TCTCACAGCCCTCTTCGGA     | ACTCAATTTTATAAGAAACGCGT  | CCCTCTCGCTCCCTCCTT      |
| dd Smed v4 36829 0 1 | ATCGACGAAAACCAATGTTGA   | ACAGCAGTCAAGAATACGATGC   | GACAGAGATAAATCAGACGGAGC |
| dd Smed v4 3703 0 1  | CCAGCAGGGTGCCAGAAT      | ACCATGTCTGCTATCAGCTCA    | ATTTGGAAATGGCTCGAAGTG   |
| dd Smed v4 39545 0 1 | ACTAATTCATCGCCACCAACAC  | TCGATACAATGAAAGACGACTGG  | TCGGAAGTACTTGGAAATTTCCA |
| dd Smed v4 4012 0 1  | CAGTGTACGAAGAAATGGTCA   | AGGGGGTTTCGGAACAGT       | ATGAGATCTGACGTGTCTGAA   |
| dd Smed v4 4154 0 1  | GGGCTGCTCATGACGTGT      | CTCAAAAGCTGATGCCATCGA    | GATCGGTCCGCGGGAATC      |
| dd Smed v4 4279 0 1  | TGGGTTAATTTTATGTTGCACGT | CGTTTTCTGCTTTAACGTTTGCT  | ATTTGACAGACAACGAGTCCA   |
| dd Smed v4 4299 0 1  | GCAAAGGACCCCATGGCA      | ACCCCAAATGAAACAGTTGCC    | ACCACAAGACACAAGGACA     |
| dd Smed v4 4381 0 1  | TGCGTCGACAATGAAATGGA    | TGAAATGGAAAACGGCATGAA    | CCCCTAGAAATCGGCA        |
| dd Smed v4 4392 0 1  | TCCGAAATTCAGAGCAGATCA   | TGGAATCGACAATTGTCTCTGA   | TGTTGGACTTTGATTGCGAGT   |
| dd Smed v4 4435 0 1  | TGCAATTTATGGGAAATCGGTG  | TCTCAAATGGAAAATCTGTCGCT  | TCAAATCTCGACATTCTGCTGA  |
| dd Smed v4 4486 0 1  | GCCGCCCTCCGTTATGTG      | CCCTCCCAAACGAAATCCC      | TGCCAATCCACTGCGGT       |
| dd Smed v4 4619 0 1  | AATCATCCACTTCGATGCCAAC  | ATCTATTATCCGAAGAGCCGTCC  | TGAAGTTCCCGTAAACAATGTG  |
| dd Smed v4 4793 0 1  | GTGGACTCTGTGCTGTTCA     | TCAATTCAAAGTTGTGCACGGA   | TGGGAGGTCAGTTGCACTC     |
| dd Smed v4 4808 0 1  | ACCATCGAAACTCGTGTGCA    | ATGGCTCCTAAAGGTAAAGTAGC  | ACAACCATCATTGTGGTCCT    |
| dd Smed v4 4902 0 1  | GGGATTATTCGGTTTCCGGGT   | TGGGCGTCGGTGGAGTAT       | ACATCGTATCCAAAACCGCA    |
| dd Smed v4 4944 0 1  | AGCAGACAAGTGTTCGTCA     | CTCTAATGTGAAATACGGTCAGC  | TCTGAGAACAAGAAATCATGCGA |
| dd Smed v4 5081 0 1  | TTTCTGTTGTGCGCCCCG      | ACAAAGGTGAAC TAGGAGTCTTT | ACGGTTCCGCGTACACAG      |
| dd Smed v4 5102 0 1  | GGTCAGCCAAAGTCCCC       | ACAGTATTTCTTAACACGGGTCA  | TGAACCATACGGAGCGGT      |
| dd Smed v4 511 0 1   | GCGATACTCACTTGGGAGG     | AGGAAAGGATATCACCGATGACA  | GCTTGATCTGAGAAAGTGAAGT  |
| dd Smed v4 5120 0 1  | TTACAGATCGGCAGGAAGC     | TGCACATCGAATGAAAACAGATC  | TGAAGTTCTAGAAAATCCAGCCA |
| dd Smed v4 526 0 1   | GCTGAATGGGGAAGGAGACA    | TGCAGAAAATGAAATGCCTGGT   | AGCCGCTCTAAATGAACCACA   |
| dd Smed v4 5390 0 1  | GTGTGGACGTTCTCTCGA      | GGTTTGGCATTGGCATTGAGT    | TGCAATCTGTCAACCATTTCGA  |
| dd Smed v4 5406 0 1  | TTTCGCTATTTAGATGAGCCGA  | TGGCCAGAAATTACTCATGTTGG  | TGTTGGTAGCTTCAATTGGGA   |
| dd Smed v4 5469 0 1  | ACTCTAATGGATCCGAAACTGGA | GGAACTGAAGGATCTGAACCT    | ACAACAAGAAATCTCGGTGAGT  |
| dd Smed v4 5525 0 1  | CTGGTCTCATAATTTGGAAGCA  | GATGTGTTTATGAAACGTCTGGA  | GAAGGCTGAGAAATTCGATCGG  |
| dd Smed v4 5531 0 1  | CGAATCACCCAGTTCAGCA     | GTCTGTCTATGACAACCAAATCT  | ACTTGGGGAGTTATCAATTCGGA |
| dd Smed v4 5630 0 1  | GTCCTACCGGCGGAAGTG      | TGCCGAAAACCTGTGACTG      | GGCACTGACCCTTGAGT       |
| dd Smed v4 5638 0 1  | CCTTCTGAAAGGCCTCCATT    | ACAACCTAGGTGTTATTGTGCT   | CGCCAACAGTAACATTAGCTGT  |
| dd Smed v4 5700 0 1  | ACTCAAAATGTCTGGTCGAGGA  | GGCTTAGGTAAGGTGGAGCT     | ACTACAATCAACATTTGTGGCCC |
| dd Smed v4 574 0 1   | TCGCTGCAGTGTGATTCA      | TGTGCCAGTGTCAAGGCC       | AGTGGATCTAAAAGGCTGTCCA  |
| dd Smed v4 5749 0 1  | TGCTGTCTTCTAAGCATAAACCA | AGACTACAATAACACCACAGGTC  | TCGAGTCTGCTTCAATGAAAGCA |
| dd Smed v4 5781 0 1  | CAGTTGACGCGATCGGGA      | ACGCAATTTGACCAGATTCAACA  | GAGTGTGTCCGCTCCAG       |
| dd Smed v4 5786 0 1  | TGCAAATTTAGCCGAAAATTTG  | TCGATGTTGCAAGGGACAA      | TGCTGAGCAATTAACCTCATCA  |
| dd Smed v4 5818 0 1  | AAACCATTTTCCCTTGCCAAA   | GAGCACCACACTAGTGGT       | AAACCACTAAAACCGATTTCGA  |
| dd Smed v4 5853 0 1  | ACTGTTTCAAACATTTCTCCGCA | CAGTCTTCGAATGCAATTAACGA  | AGCGAGGTAGTGAATCCTACA   |

|                     |                           |                           |                          |
|---------------------|---------------------------|---------------------------|--------------------------|
| dd Smed v4 5862 0 1 | ACGATATTTATGCCGCCTATCA    | TCCTCAACAATTCCGGTACTGAA   | GGCTATTTGAATGGATTCTCGCC  |
| dd Smed v4 5924 0 1 | GGTTCCGGTGCACAAGGA        | TGTAGCTGCACTTGATTCGGT     | ACCGCTATGTCAAAATCAACCA   |
| dd Smed v4 5999 0 1 | TTTTTCTGCTCACGGGAAATCC    | TCAAATCTCAGTAGGCTAAGGGA   | ATGAAAGAATTGATTGCCAACGG  |
| dd Smed v4 6047 0 1 | GCCCCGAAAACAACAACACA      | ACCTGCAAGATCCTCGAGA       | TGCCGGATGTTGGTCCAG       |
| dd Smed v4 6053 0 1 | TGGTGAGGAAATTATGCCTACTG   | CCGATCGAATAAGATTTCCAAGC   | TGGGCGACGTAGATGTCT       |
| dd Smed v4 6075 0 1 | TTTTTCAATCTTTTCTAGCTCTGGC | CTAGAGCGTGTTTTTCTTTACCG   | TCAATGATATTGATGATGCAGCC  |
| dd Smed v4 6278 0 1 | ACATGCCACCGAAGAAACT       | TGACTGCATTGAAAAAGGAATCA   | TCCTCCTCCTCGTTCGAGA      |
| dd Smed v4 6349 0 1 | AAACCAGTAATTAAGCGACCT     | TGGCTTTTCTTTTATCAGCTGCC   | ACCATTGATAAACGTGATGAACC  |
| dd Smed v4 6420 0 1 | TTTGGAAATTATTGGCGAAGGAG   | AGAAAAGCTATTTCGTTCGATCCGA | TGTTTGTCTTTTTGGAAAGAGGTG |
| dd Smed v4 6444 0 1 | AAATCCACAAAGACAACAACAGC   | GGGTGACCGCTCCTGTG         | AAGGTTCTAACTAGCAAATGGGC  |
| dd Smed v4 6463 0 1 | GACGTTTAAACAATCGGCGCT     | TGAGTTTTTGTGGGTTCTCGA     | ATAGAGAAAGGCCGAGC        |
| dd Smed v4 6562 0 1 | ACCGATGCTTGGGGAATGA       | GTCGAAGTGAAGATGTTCCGGT    | ACAGTGCAGTCGGAACTTGT     |
| dd Smed v4 668 0 1  | TGATCTTTGCCAATCAAGCCA     | GCTACTTAGCATGGGAGCTACT    | TCCAAGTCTAGTCCAAATCGTCA  |
| dd Smed v4 678 0 1  | CTTTTCAAGCTGAAATCGCACA    | GCGATGCACTAGACAAAATTCGA   | TAGCGCAGGAAGTCAGCC       |
| dd Smed v4 6794 0 1 | CACCTTATTTACCGGGGCA       | TGATGCTTACTTTACGAGATGGT   | TGGCCAAATGTAAAACGAGACT   |
| dd Smed v4 681 0 1  | ACAATTTGCCACTGTGACGTG     | CCCCCGATCAGAAAAAGGCT      | ACTGCATAGTCCATCATTGCA    |
| dd Smed v4 6813 0 1 | TGCCTATTTATCCCTTGTCTTGG   | CTTCCACAAAATCTCCAATCTGG   | ATCATCTGCTGTTGTGGTTTTGC  |
| dd Smed v4 6882 0 1 | CCTGTTGAAGGGGTCGATT       | TGCGGAGAAATGTGAATTACCT    | GCAATTAACGCTTTGCATCTCC   |
| dd Smed v4 6884 0 1 | CCGGAGGTCTTGGCACAA        | TGTTGGATATTTGTCGGTGGACT   | CGTTTGTGAGTACTTCTTGATCG  |
| dd Smed v4 6929 0 1 | CCTTGTCACGGTAGCGCA        | TCCGTTGTCAATGTATCTGTCC    | CACAGATCCAGCACTCGGT      |
| dd Smed v4 6948 0 1 | AGCCGGTGTCAATTCCTCA       | ATTATCTCTGCGAGAACTGGATC   | GTGACCGTTTGCCTTGTCT      |
| dd Smed v4 7038 0 1 | TTCAGCGTGGTCCG            | ACAATGCGACAAATGTGCCA      | GTTTCTCACCGCTGTGGA       |
| dd Smed v4 7063 0 1 | TCCTTGCTCATTGCTGCCA       | GCTCGGATTAATGGCAGCG       | ACGGACGGCTCTTTTCGA       |
| dd Smed v4 7128 0 1 | TGTGTTACAGAGTTTTTGATTCA   | TGATTTAGCTACATCCGAGGAAA   | AACGGTGACCAGGCATCG       |
| dd Smed v4 7166 0 1 | GAAAGTAACCTTTGCCGACGA     | ACCACTTGCAATTTCAAAAATGGA  | TGCCAATTGTGTCATAAACCCT   |
| dd Smed v4 7168 1 1 | ACAGATGCATGAGTTTGTGAAAT   | ACACATCAACAATAGCTCTGACG   | AGTTGCAAGGTCAGCGTGA      |
| dd Smed v4 7262 0 1 | CAACACGCGCAGACACAC        | TCCGTTTCTATTTGATCGCCA     | TCAGCAATCTGACGAACCTGA    |
| dd Smed v4 7295 0 1 | GGACTTCGATAAAAACACTTGTCA  | CACAATTGACATTGGTGTTCGA    | TGTCAACCAGCAAACCGA       |
| dd Smed v4 7326 0 1 | TGCATATCTGGACGTGGATTAGT   | TTCACAAAATGGAAACAGTCA     | ACTTTTCTCTTGAAGTTTACA    |
| dd Smed v4 7413 0 1 | TCCATTGAACCAGAAATTCGGC    | AGTCGGATGGCAAATGCTGA      | AAATTTGGGCGCTGAAGCAC     |
| dd Smed v4 7444 0 1 | ACCAAGACGCAGAGTTGATGA     | ATTGCTCCATTTTGGTTTCCAA    | CAGCAGCATTAGCATCAGCA     |
| dd Smed v4 758 1 1  | CCCTGACAGACAGCACCG        | CATATTGTCGATACAGGTGTGGG   | TTCCCGCTGCTCTTTGGC       |
| dd Smed v4 7607 0 1 | CATCATGAAGCGAAACACAATGT   | TCAAATTTAGACAACCTCCGAACA  | TGTTACAATGTAGCAGTTGCCA   |
| dd Smed v4 766 0 1  | TCGTGGCAAAGGCGTCA         | ACAGTTAAAGCGGGAGGC        | TGCAACACAGCATAGCACT      |
| dd Smed v4 7701 0 1 | CCGCTCCAGTACGAACGG        | TCAGTGCATCAAAGAAAAGCA     | AAAGCCGACCCATGTGA        |
| dd Smed v4 7731 0 1 | AACTCTACCAGTGAATAATCGACA  | ACTCCGTTGCCAGGAATCA       | TGCCTGAGCCTTTCATCAGA     |
| dd Smed v4 7788 0 1 | AGGTACAGGGTTTAAAGCAGCA    | ACACCAAGGCGCCAAAGT        | TGATTGTCGTTTGTAAATGCCTT  |
| dd Smed v4 7921 0 1 | ATGGTGCCATTGTCCCGG        | TGGATGACGGAAATCAAGGTCA    | AACCAGAGTTGCCGGTG        |
| dd Smed v4 8252 0 1 | TGACAGTGCCAAATTTGCTACA    | GGATCCGTGATCATTCTTGGC     | ATTTGTGAAGGGCCCCCA       |
| dd Smed v4 8302 0 1 | TGAAGCTGACAACGGGCA        | AGCTGTATCCGTTGAGGCAC      | GGTTGACGGTTGAGGGGT       |
| dd Smed v4 8340 0 1 | GATGCAGTCTGACCCGCA        | TGCAACAGGAAGGAAAGTTACTG   | ACCTGTGTAACCAAGCCA       |
| dd Smed v4 8356 0 1 | GGAACCGTCTATGAATGCGC      | CGTAAAGGAAGAATGCCCCCT     | CCCGAATATCCCGCTGGG       |
| dd Smed v4 8439 0 1 | TTGTTACAAATGCACGGTAGTTT   | TGAGTTTCGGTGCTATACGGG     | TGCAAAATGTCCAATTGCAAGACT |
| dd Smed v4 8569 0 1 | AGGCTTTGAAACCAACAGGA      | TGCATTGAAAGATCTTATTCCCG   | GCCAGCGACAACCTTTCGG      |

|                     |                          |                          |                          |
|---------------------|--------------------------|--------------------------|--------------------------|
| dd Smed v4 8580 0 1 | TCTCGTGCAGTAATTTCTACCGA  | AGGAGAAAATGGGATTGCGGA    | TCCCCAGTTGCAGTTCGAG      |
| dd Smed v4 8829 0 1 | TGGGGCAGAATCTTGTGCT      | TGGTGGTCAAGGATTTGGG      | TATGTTGACGCAGCGGCC       |
| dd Smed v4 8835 0 1 | TTCGCCAACCTCCAGCAA       | AGGGTGAAGAAGTGTCTCAAGA   | GCGCTTTCACACACAAGCA      |
| dd Smed v4 8839 0 1 | GGATGACGGATTCTCTACGGT    | TCAAATCTTCTGCAAACGTTGA   | TCGCCGAAAAATATTTCCAACA   |
| dd Smed v4 8858 0 1 | GCGGTTCTTGTCCAGTGGGA     | TGAGTTGGCCGATATTAACAGT   | CGTTCTCCGGTGTGGGTT       |
| dd Smed v4 8901 0 1 | TGAAGGTTACACTCGGGGG      | CTTTGACTGTCAAGCTGGGC     | ACTTGAAGGACACAATTCGAG    |
| dd Smed v4 8918 0 1 | TCACAGCCTGGGAAAACCTCC    | CGATAGCATGAACATCATCACAA  | TGCGACTGGTAAGCCGTT       |
| dd Smed v4 8994 0 1 | TAAATGTCGCGGGGCAGT       | TGCCAGTATTGGGTGCACA      | CCGGCTCCAGAACTGCTC       |
| dd Smed v4 9050 0 1 | TCCAGTCCGTTGGAAAGGA      | TGTTTATGAGGAGAAAACCTCGT  | TGAATTGTCTGACAAGGCAGGA   |
| dd Smed v4 9165 0 1 | CGACAGCAAACAGGTAGCC      | TGGGGTCAAGTACAAAGAAAGAAG | ACGCACAAACCAAACCTGACA    |
| dd Smed v4 9202 0 1 | AGAAATATAACACGGTGTGTTGCA | TGACTTGTGCGAATTGTTGCA    | ACCTTAAGTGGCGGATGTTGT    |
| dd Smed v4 9204 0 1 | ACAACTCGATCATTCCTTCTCGT  | CGTTCTCGTTTCCACCGTCA     | TCGAACGCATTATGAGCGA      |
| dd Smed v4 9273 0 1 | AGATGGCAGTGAAGTGGACA     | TGGATTAACGCCTCCGCA       | TGAGAACTGAACCTTTTGGTAGCA |
| dd Smed v4 9402 0 1 | GGAGGCTGGGGATGGGTA       | TGGTGCATGTATTAGCAGATGGT  | TCCATCCTGCCAAGGGGG       |
| dd Smed v4 9410 0 1 | CTCCTACTGGGAAATTTGGTACA  | GACACACCACAACCTTTAGAAGA  | TCAAATTCAGTTTATTGCGGGT   |
| dd Smed v4 9416 0 1 | TCGAACAACGAGCAACGG       | CGTGCCTTCATCATTTTTGGC    | AATCGTCCACCCCTCGGA       |
| dd Smed v4 9472 0 1 | CAATTGTGCGTATTTTGTGGTGT  | CGTAATTGGAGCCGGCCA       | GATCAAACCTAATCGCACCAGCA  |
| dd Smed v4 9490 0 1 | AGATGACAACCAAAGCCGGA     | TGTATCGACAATTTACCGATCGA  | AGGGGCCGGTTCAGACT        |
| dd Smed v4 9491 0 1 | TGAGCCAAAAAGAAGAAAGTGCA  | GCATGGAAGATACTCAGGACGT   | CGGATCAGATAAGCTCCATTTCG  |
| dd Smed v4 9519 0 1 | TGCAAAGCTAACGCAGAAGA     | CTCTACGGTATTGACTTTACCA   | TCCCATGGAAGCCACGTTT      |
| dd Smed v4 953 0 1  | AGGACCACCTGGCAGCTA       | CCGCAACGGCTGAAACTG       | GCTGATCATCTGCTCACA       |
| dd Smed v4 9530 0 1 | ACAGCCAGTCTTCGCCAA       | TCCCTCGCAGCATTTGTGT      | ACGCTTCAACCTTTGATCGG     |
| dd Smed v4 9546 0 1 | CGTTGTTTTCAATGGGTAGCTGT  | TTGGTGAATATTCGCATTCCAT   | TCTATCGCGCATGATAGCAA     |
| dd Smed v4 961 0 1  | GCTTATGCTATGCTCAATGTGGA  | TTGGAGACATGGTTCTTAGCCC   | AGGCACATCCATAATAGTCTCGT  |
| dd Smed v4 9610 0 1 | TCAATCTCATTCTGGACAGTGT   | TCCCTCAAATGTCTACGTAGTGG  | TAAAATTGCCTCATTCTGTGTA   |
| dd Smed v4 9642 0 1 | TGCCACAGACAATCTTGCT      | TGTTTCTGCCAATGAGTTAGAT   | CTGTCCAACAGCGGCAAC       |
| dd Smed v4 9677 0 1 | CCGGGGCCCTCAAATTGT       | TTCTGCTGACAAAACCTCTCGA   | AGCTCATGACGCCGAAG        |
| dd Smed v4 9905 0 1 | ACAACAACCGAAAATTTGCGCA   | CGTCCTAATTCTCACAATCGCAC  | ATTGTGCGTGGGCAGTGG       |
| dd Smed v4 996 0 1  | ACGGTGTGAATGGATCTTCAGA   | AACATGGGAAATGGGTATTGTGA  | CCGTTTTGTTTACCAGCGG      |

## Additional sequences used for mapping

>rRNA\_5s

TCACCCGATCTCGTTCGATCTCGGAAGTTAAGCAGGTTAAGGCCTCGTTAGTACTTGGATGGGTGACCGCCTGGGA  
ATACGAGGTGTTGTGGACTTTATACTGTTTGTCCACGACCATACTAATCTGGGTTACCCGATCTCGTTCGATCTC  
GG

>mtRNA\_2

TCTAAGCAGTGGTATCAACGCAGAGTACGGGGGTATTGCACTGTTTAGTTGTGATATTTTCCTTTTTGTATTACG  
GTTTGTAGGTATTTTTATGTTTTTATTCTCTCGAATGGAATATGATATATCTTTTGTGTGTTTTGTTTTATTTCT  
TTGGTTAACATTAGAA

>mtRNA\_1

AGTTGGTGTGTTGTTTGTGTCAGGTAAGTTAATTAATACTAGCAGATTCATGTTCTGTCTATGAGTCCTTTCTCT  
GTATATGTGGTTAAGATAGTTTATTTCAGAATGTTAATTTGTGGAGTTAATGGTAAAAGACTTGTTTTTCTTAATAT  
TTGTTTTAATAGCTTA

>unidentified

CGGCCGGACGTAGCGGTGTGCGTCTGTAATCCAACACTACTAGGAGGCCGGGTATATGAATGGTTTGAGATGAGGAGT  
TCTGTGAGCATTGCGCCTATGTAGATCGGATGTCCACAGTAAGCTTGGCGTCAACATGGTTATATTGTCCGAGGAT  
AGAATACCCAGGTTGT

>SMED\_11901\_V2

ATGAATGAAATTTTGGAAAAGGATATGAAAGCGATTGAATCCATTAAAGTAAAAGAAAAAAGGCTGTTGATGGTT  
TTATGGGTACCTCATCGTTTCATGGAGTGATTCAAGCATATCATAAACGAAATAAAATTGATAAAGGGAGCTGGTT  
CATCAGTTTAGTTATTTGTATGTTTGGCTTAATTGGGCATCTCTACCTAATAATCAGTAGATATATAAGTTTGCCC  
ACAAC TATTGACATGGTCTCTTCAGTGAATTTTGATCCTTTTCTGCTGTCGCAATATGTCGGTTACCTTTATTA  
GCAGGGATAAATTCACCAAGTATTACAATACAAC TCAAGTTTCCCTTAATAAAAAGCTAGTTGGGGATATTTCTA  
CGTCGATGTAAGTGCCTTGAATTTCTGGAGGTCCTAAGTAAACAACAAGCAAAGACATAAACAGTAGTTTCAGTT  
CTTGGAAAGTATTGGGATGAAGCTGAAACCACTTTCTATAGATTCCAGAAAATGATGAATGTTTCAATAGGTCATC  
GAAATTATGAAATGATTTTCTTTTGTGAAATTAACAATAAACCTTGCTCATGGGAACATTTCCCTTGAATTCGATCA  
TCCGATTTATAAGCGATGTTTTAAATTCCTATCCGGTAACTGATGAAGATGAAATTCAGATAAATGATATTG  
GGGCTTTATGTTGATGATGACTATCAAAGAGACACTGATGATATTA AACGATAATAACCTCTCATGGAGGAAAGG  
TTACTATAAATGAAGCAAGTATTTACCTGGAAGTTCATTTGAACATTTTCCGTCAGGATTCCAAACGAT  
GTTTCGATTGAAACAAGAAGGTAGCAGTCAAATCAATAAACCAAGGCTCCATGCCAAGTTAATACTGATTCAGTG  
ATCAACGTTTTCAACGATTATGAATATGATGGCTCAACAAATATCACAATACCATATAAATACAATGTGATACTTT  
GCAGACAATACCATCAACAAATAGAATGCGTTAAAAGATGCAAGTGTAAAATCCGAACATTCAGTATTTGTTGA  
TGCTATTAAGAATTCGAAAATAAATCATCTTTTGGCATGAGATTCAGCTTAATTCCTCTTTTCAAGCATTATT  
AATCAGCTTGATTGCTTTATAATTTAGATTATGATCAGTATTTAATGAGAATGTTATATCATTATGTTCCGGGAT  
TGTGTAATCAGGTAGAATATTCAATGTATTCTTATAC TATGCCTTGGTTCCGTTAAAACAATGATCAAAGAAATGGA  
GTTTGTGCAATGAGAAATTCATGGCCCAATTACAACAGTCTAATTAATTCATCCAATTTGTAAGGATTATGGAACC  
ATTGAATAGAGCACGCAATTGCGTAATCAAATCCATGAAAGATAATGATCAAGCCAGCTTGTGTTTCGCAATGATT  
AATATTC AATTTGAATCTCCAGAAAAGAAATTATTCGAGAATATGAGGCATATTTATTTGGGGAATTTACTCAGTG  
ATTTCCGGCGGATTTTAGGACTGTGGATTGGAATGTCTCTGATAACAATTATTGAAATCATATACTTAGCATGCTC  
GTTGAGTAAAACAAAAC TGAACGCGCTGCTTCAGTTTTCAAAAAGTCAATCCACAAGAGAAGTCTGAAAAGGAAT  
TCCGATAAAAACAAAAT TATCAGAATCGGAATAGAAAATGAGGCGTATGAAAATTAG

## Contig Ids corresponding to genes shown in figures

| Fig. | Panel | Gene annotation in figure | Contig               | Best-blast hit description                                 | ID         | E-value   | Organism |
|------|-------|---------------------------|----------------------|------------------------------------------------------------|------------|-----------|----------|
| 1    | C     | <i>smedwi-1</i>           | dd_Smed_v4_659_0_1   | smedwi-1                                                   | DQ186985.1 | 0         | Smed     |
| 1    | C     | <i>tropomyosin</i>        | dd_Smed_v4_436_0_1   | tropomyosin 1 (alpha) (TPM1)                               | uc002alp.3 | 1.00E-54  | Human    |
| 1    | C     | <i>vim-1</i>              | dd_Smed_v4_364_0_1   | vimentin (VIM)                                             | uc001iou.2 | 3.00E-29  | Human    |
| 1    | C     | <i>synapsin</i>           | dd_Smed_v4_3135_0_1  | synapsin II (SYN2)IIb                                      | uc003bwl.1 | 1.00E-121 | Human    |
| 1    | E     | <i>znf91</i>              | dd_Smed_v4_7664_0_1  | zinc finger protein 91 (ZNF91)                             | uc002nre.3 | 3.00E-09  | Human    |
| 1    | E     | <i>zfp-1</i>              | dd_Smed_v4_8720_0_1  | ZFP-1                                                      | JQ425154.1 | 0         | Smed     |
| 1    | E     | <i>hnf4</i>               | dd_Smed_v4_1694_0_1  | HNF4 (hnf4)                                                | JF802199.1 | 0         | Smed     |
| 2    | C     | <i>egr-2</i>              | dd_Smed_v4_9273_0_1  | clone SMED_20251_V2 early growth response-2                | JX010482.1 | 0         | Smed     |
| 2    | C     | <i>RPSAP58</i>            | dd_Smed_v4_8634_0_1  | ribosomal protein SA pseudogene 58 (RPSAP58)               | uc002nrr.3 | 3.00E-22  | Human    |
| 2    | C     | <i>wntless</i>            | dd_Smed_v4_9546_0_1  | Evi/Wls                                                    | FJ463748.1 | 0         | Smed     |
| 2    | C     | <i>svopl</i>              | dd_Smed_v4_12695_0_1 | SVOP-like (SVOPL)                                          | uc011kqh.2 | 1.00E-42  | Human    |
| 2    | C     | <i>dd_9490</i>            | dd_Smed_v4_9490_0_1  | Smed06730_V2 hypothetical protein                          | JX010552.1 | 0         | Smed     |
| 3    | A     | <i>Tob2</i>               | dd_Smed_v4_7444_0_1  | transducer of ERBB2, 2 (TOB2)                              | uc021wqf.1 | 8.00E-28  | Human    |
| 3    | A     | <i>dd_9519</i>            | dd_Smed_v4_9519_0_1  | NA                                                         | NA         | NA        | NA       |
| 3    | A     | <i>svopl</i>              | dd_Smed_v4_12695_0_1 | SVOP-like (SVOPL)                                          | uc011kqh.2 | 1.00E-42  | Human    |
| 3    | B     | <i>egr-2</i>              | dd_Smed_v4_9273_0_1  | clone SMED_20251_V2 early growth response-2                | JX010482.1 | 0         | Smed     |
| 4    | B     | <i>notum</i>              | dd_Smed_v4_24180_0_1 | notum                                                      | JF725701.1 | 0         | Smed     |
| 4    | B     | <i>sulfotransferase</i>   | dd_Smed_v4_15647_0_1 | sulfotransferase family, cytosolic, 1C, member 3 (SULT1C3) | uc010ywo.2 | 6.00E-48  | Human    |
| 4    | B     | <i>klf</i>                | dd_Smed_v4_3638_0_1  | Kruppel-like factor 13 (KLF13)                             | uc001zfo.3 | 9.00E-34  | Human    |
| 4    | B     | <i>TRAF-1</i>             | dd_Smed_v4_4392_0_1  | Smed19658_V2 TNF receptor associated factor-1              | JX010627.1 | 8.00E-136 | Smed     |
| 4    | B     | <i>H2B</i>                | dd_Smed_v4_4808_0_1  | Smed15708_V2 histone h2b-2                                 | JX010617.1 | 1.00E-104 | Smed     |
| 4    | B     | <i>dd_6806</i>            | dd_Smed_v4_6808_0_1  | NA                                                         | NA         | NA        | NA       |
| 4    | B     | <i>rhomboid</i>           | dd_Smed_v4_13835_0_1 | 5B07 rhomboid-like protein                                 | KJ573355.1 | 0         | Smed     |
| 5    | B     | <i>mex-3</i>              | dd_Smed_v4_6053_0_1  | mex-3 homolog A (C. elegans) (MEX3A)                       | uc001fnd.4 | 2.00E-08  | Human    |
| 5    | B     | <i>hsp70</i>              | dd_Smed_v4_320_0_1   | heat shock 70kDa protein 8 (HSPA8)                         | uc001pyo.3 | 0         | Human    |
| 5    | B     | <i>traf2</i>              | dd_Smed_v4_10569_0_1 | Smed07121_V2 TNF receptor associated factor-2              | JX010549.1 | 0         | Smed     |
| 5    | B     | <i>syt12</i>              | dd_Smed_v4_21069_0_1 | synaptotagmin-like 2 (SYTL2)h                              | uc001paw.3 | 1.00E-35  | Human    |
| 5    | B     | <i>dd_14011</i>           | dd_Smed_v4_14011_0_1 | NA                                                         | NA         | NA        | NA       |
| 5    | B     | <i>CALCR</i>              | dd_Smed_v4_15499_0_1 | calcitonin receptor (CALCR)                                | uc003umw.2 | 8.00E-22  | Human    |
| 5    | B     | <i>wntless</i>            | dd_Smed_v4_11629_0_1 | Evi/Wls                                                    | FJ463748.1 | 0         | Smed     |

|    |     |                      |                      |                                                                                     |             |           |       |
|----|-----|----------------------|----------------------|-------------------------------------------------------------------------------------|-------------|-----------|-------|
| 5  | B   | <i>dd_8302</i>       | dd_Smed_v4_8302_0_1  | NA                                                                                  | NA          | NA        | NA    |
| 5  | B   | <i>slc16a14</i>      | dd_Smed_v4_9402_0_1  | solute carrier family 16, member 14 (monocarboxylic acid transporter 14) (SLC16A14) | uc002_vqf.3 | 8.00E-39  | Human |
| 5  | B   | <i>mpped1</i>        | dd_Smed_v4_9610_0_1  | metallophosphoesterase domain containing 1 (MPPED1)                                 | uc011_apy.2 | 2.00E-16  | Human |
| 5  | B   | <i>rrm2b</i>         | dd_Smed_v4_5862_0_1  | Smed05893_V2 ribonucleoside diphosphate reductase subunit M2                        | JX0105_83.1 | 0         | Smed  |
| 5  | B   | <i>dd_8901</i>       | dd_Smed_v4_8901_0_1  | NA                                                                                  | NA          | NA        | NA    |
| 5  | B   | <i>dd_9519</i>       | dd_Smed_v4_9519_0_1  | NA                                                                                  | NA          | NA        | NA    |
| 5  | B   | <i>notch</i>         | dd_Smed_v4_10716_0_1 | notch 1 (NOTCH1)                                                                    | uc004c_hz.3 | 8.00E-57  | Human |
| 5  | B   | <i>jun-1*</i>        | dd_Smed_v4_5749_0_1  | Smed03061_V2 1-Jun                                                                  | JX0105_76.1 | 0         | Smed  |
| 5  | B   | <i>nlg-1*</i>        | dd_Smed_v4_14068_0_1 | noggin-like protein 1                                                               | EF633_691.1 | 0         | Smed  |
| 5  | B   | <i>inhibin-1*</i>    | dd_Smed_v4_7607_0_1  | clone SMED_01282_V2 inhibin-1                                                       | JX0104_79.1 | 0         | Smed  |
| 5  | B   | <i>glypican-1*</i>   | dd_Smed_v4_4154_0_1  | clone SMED_05117_V2 glypican-1                                                      | JX0104_69.1 | 0         | Smed  |
| 5  | B   | <i>dd_20048</i>      | dd_Smed_v4_20048_0_1 | NA                                                                                  | NA          | NA        | NA    |
| 5  | B   | <i>inx-13</i>        | dd_Smed_v4_11501_0_1 | INX-13                                                                              | JQ425_145.1 | 0         | Smed  |
| 5  | B   | <i>cyp2j2</i>        | dd_Smed_v4_2394_0_1  | cytochrome P450, family 2, subfamily J, polypeptide 2 (CYP2J2)                      | uc001c_zq.3 | 3.00E-36  | Human |
| 5  | B   | <i>sbspon</i>        | dd_Smed_v4_5786_0_1  | somatomedin B and thrombospondin, type 1 domain containing (SBSPON)                 | uc003_xzf.3 | 9.00E-15  | Human |
| 5  | B   | <i>pif1</i>          | dd_Smed_v4_16842_0_1 | PIF1 5'-to-3' DNA helicase (PIF1)                                                   | uc010_uiq.1 | 1.00E-119 | Human |
| 5  | B   | <i>dd_13860</i>      | dd_Smed_v4_13860_0_1 | NA                                                                                  | NA          | NA        | NA    |
| 5  | B   | <i>pxdn</i>          | dd_Smed_v4_3603_0_1  | peroxidasin homolog (Drosophila) (PXDN)                                             | uc002_qxa.3 | 0         | Human |
| 5  | B   | <i>sfrp1</i>         | dd_Smed_v4_13985_0_1 | secreted frizzled-related protein 1 ( <i>sfrp1</i> )                                | EU296_635.1 | 0         | Smed  |
| 5  | B   | <i>med12l</i>        | dd_Smed_v4_11943_0_1 | mediator complex subunit 12-like (MED12L)                                           | uc003_eyp.3 | 8.00E-64  | Human |
| 5  | B   | <i>plasminogen-1</i> | dd_Smed_v4_23420_0_1 | Smed27240_V2 plasminogen-1                                                          | JX0106_25.1 | 0         | Smed  |
| 5  | D-E | <i>egr-1l1</i>       | dd_Smed_v4_7731_0_1  | EGR-like protein 1                                                                  | JF9149_65.1 | 0         | Smed  |
| 5  | D-E | <i>runt-1</i>        | dd_Smed_v4_16222_0_1 | runt-like 1 protein                                                                 | JF7208_54.1 | 0         | Smed  |
| 5  | D-E | <i>Inhibin-1</i>     | dd_Smed_v4_7607_0_1  | clone SMED_01282_V2 inhibin-1                                                       | JX0104_79.1 | 0         | Smed  |
| S2 | A   | <i>Rab-11B</i>       | dd_Smed_v4_7604_0_1  | EF-hand calcium binding domain 4B (EFCAB4B)                                         | uc010s_en.1 | 3.00E-45  | Human |
| S2 | A   | <i>anoctamin 7</i>   | dd_Smed_v4_4761_0_1  | anoctamin 7 (ANO7)NGEP-L                                                            | uc002_wax.2 | 0         | Human |
| S2 | A   | <i>ESRP-1</i>        | dd_Smed_v4_5053_0_1  | epithelial splicing regulatory protein 1 (ESRP1)                                    | uc003_ygt.4 | 4.00E-117 | Human |
| S2 | A   | <i>myoferlin</i>     | dd_Smed_v4_6816_0_1  | myoferlin (MYOF)                                                                    | uc001_kio.3 | 0         | Human |
| S3 | C   | <i>plasminogen-1</i> | dd_Smed_v4_23420_0_1 | Smed27240_V2 plasminogen-1                                                          | JX0106_25.1 | 0         | Smed  |
| S3 | C   | <i>fos-1</i>         | dd_Smed_v4_2789_0_1  | clone SMED_00055_V2 fos-1                                                           | JX0104_71.1 | 0         | Smed  |
| S3 | C   | <i>hadrian</i>       | dd_Smed_v4_3606_0_1  | clone SMED_02793_V2 hadrian                                                         | JX0104_72.1 | 0         | Smed  |
| S3 | C   | <i>glypican-1</i>    | dd_Smed_v4_4154_0_1  | clone SMED_05117_V2 glypican-1                                                      | JX0104_69.1 | 0         | Smed  |
| S3 | C   | <i>dusp10</i>        | dd_Smed_v4_4619_0_1  | dual specificity phosphatase 10 (DUSP10)                                            | uc001_hmy.2 | 7.00E-39  | Human |

|        |   |                  |                          |                                                                                     |                |          |       |
|--------|---|------------------|--------------------------|-------------------------------------------------------------------------------------|----------------|----------|-------|
| S<br>3 | C | <i>wntless</i>   | dd_Smed_v4<br>_11629_0_1 | Evi/Wls                                                                             | FJ4637<br>48.1 | 0        | Smed  |
| S<br>3 | C | <i>egr-1</i>     | dd_Smed_v4<br>_7731_0_1  | EGR-like protein 1                                                                  | JF9149<br>65.1 | 0        | Smed  |
| S<br>3 | C | <i>egr-4</i>     | dd_Smed_v4<br>_9410_0_1  | clone SMED_09938_V2 early growth response-4                                         | JX0104<br>83.1 | 0        | Smed  |
| S<br>3 | C | <i>HSP20*</i>    | dd_Smed_v4<br>_5406_0_1  | NA                                                                                  | NA             | NA       | NA    |
| S<br>3 | C | <i>innexin-1</i> | dd_Smed_v4<br>_11254_0_1 | Smed09630_V2 innexin-1                                                              | JX0106<br>23.1 | 0        | Smed  |
| S<br>3 | C | <i>dd_4944</i>   | dd_Smed_v4<br>_4944_0_1  | NA                                                                                  | NA             | NA       | NA    |
| S<br>3 | C | <i>traf2</i>     | dd_Smed_v4<br>_10569_0_1 | Smed07121_V2 TNF receptor associated factor-2                                       | JX0105<br>49.1 | 0        | Smed  |
| S<br>3 | C | <i>mex-3</i>     | dd_Smed_v4<br>_6053_0_1  | mex-3 homolog A (C. elegans) (MEX3A)                                                | uc001f<br>nd.4 | 2.00E-08 | Human |
| S<br>3 | C | <i>Jun-1</i>     | dd_Smed_v4<br>_5749_0_1  | Smed03061_V2 1-Jun                                                                  | JX0105<br>76.1 | 0        | Smed  |
| S<br>3 | C | <i>sfrp1</i>     | dd_Smed_v4<br>_13985_0_1 | sFRP1                                                                               | EU296<br>635.1 | 0        | Smed  |
| S<br>3 | C | <i>MPPED1</i>    | dd_Smed_v4<br>_9610_0_1  | metallophosphoesterase domain containing 1 (MPPED1)                                 | uc011<br>apy.2 | 2.00E-16 | Human |
| S<br>3 | C | <i>7tm*</i>      | dd_Smed_v4<br>_20048_0_1 | NA                                                                                  | NA             | NA       | NA    |
| S<br>3 | C | <i>inx-13</i>    | dd_Smed_v4<br>_11501_0_1 | INX-13                                                                              | JQ425<br>145.1 | 0        | Smed  |
| S<br>3 | C | <i>CPO</i>       | dd_Smed_v4<br>_5999_0_1  | carboxypeptidase O (CPO)                                                            | uc002<br>vby.2 | 8.00E-63 | Human |
| S<br>3 | C | <i>ldlr-1</i>    | dd_Smed_v4<br>_1581_0_1  | Smed05022_V2 low density lipoprotein receptor-1                                     | JX0105<br>30.1 | 0        | Smed  |
| S<br>3 | C | <i>SLC16A14</i>  | dd_Smed_v4<br>_9402_0_1  | solute carrier family 16, member 14 (monocarboxylic acid transporter 14) (SLC16A14) | uc002<br>vqf.3 | 8.00E-39 | Human |
| S<br>3 | C | <i>CYP2J2</i>    | dd_Smed_v4<br>_2394_0_1  | cytochrome P450, family 2, subfamily J, polypeptide 2 (CYP2J2)                      | uc001c<br>zq.3 | 3.00E-36 | Human |
| S<br>3 | C | <i>dd_5390</i>   | dd_Smed_v4<br>_5390_0_1  | NA                                                                                  | NA             | NA       | NA    |
| S<br>3 | C | <i>rrm2b</i>     | dd_Smed_v4<br>_5862_0_1  | Smed05893_V2 ribonucleoside diphosphate reductase subunit M2                        | JX0105<br>83.1 | 0        | Smed  |
| S<br>3 | C | <i>dd_9642</i>   | dd_Smed_v4<br>_9642_0_1  | NA                                                                                  | NA             | NA       | NA    |
| S<br>3 | C | <i>sbspon</i>    | dd_Smed_v4<br>_5786_0_1  | somatomedin B and thrombospondin, type 1 domain containing (SBSPON)                 | uc003<br>xzf.3 | 9.00E-15 | Human |
| S<br>3 | C | <i>HYOU1</i>     | dd_Smed_v4<br>_2324_0_1  | hypoxia up-regulated 1 (HYOU1)                                                      | uc010r<br>yu.1 | 0        | Human |
| S<br>3 | C | <i>HSP90*</i>    | dd_Smed_v4<br>_758_1_1   | NA                                                                                  | uc001t<br>kb.1 | 0        | Human |
| S<br>3 | C | <i>dd_9519</i>   | dd_Smed_v4<br>_9519_0_1  | NA                                                                                  | NA             | NA       | NA    |
| S<br>3 | C | <i>HSP70*</i>    | dd_Smed_v4<br>_1087_0_1  | heat shock 70kDa protein 4-like (HSPA4L)                                            | uc003i<br>fm.3 | 0        | Human |



## Supplementary References

- Bolger, A.M., Lohse, M., and Usadel, B. (2014). Trimmomatic: a flexible trimmer for Illumina sequence data. *Bioinformatics* 30, 2114-2120.
- Chechik, G., and Koller, D. (2009). Timing of gene expression responses to environmental changes. *Journal of computational biology : a journal of computational molecular cell biology* 16, 279-290.
- Chechik, G., Oh, E., Rando, O., Weissman, J., Regev, A., and Koller, D. (2008). Activity motifs reveal principles of timing in transcriptional control of the yeast metabolic network. *Nature biotechnology* 26, 1251-1259.
- Chung, N.C., and Storey, J.D. (2015). Statistical significance of variables driving systematic variation in high-dimensional data. *Bioinformatics* 31, 545-554.
- Eisenhoffer, G.T., Kang, H., and Sánchez Alvarado, A. (2008). Molecular analysis of stem cells and their descendants during cell turnover and regeneration in the planarian *Schmidtea mediterranea*. *Cell stem cell* 3, 327-339.
- Engreitz, J.M., Sirokman, K., McDonel, P., Shishkin, A.A., Surka, C., Russell, P., Grossman, S.R., Chow, A.Y., Guttman, M., and Lander, E.S. (2014). RNA-RNA interactions enable specific targeting of noncoding RNAs to nascent Pre-mRNAs and chromatin sites. *Cell* 159, 188-199.
- Fu, L., Niu, B., Zhu, Z., Wu, S., and Li, W. (2012). CD-HIT: accelerated for clustering the next-generation sequencing data. *Bioinformatics* 28, 3150-3152.
- Gurley, K.A., Elliott, S.A., Simakov, O., Schmidt, H.A., Holstein, T.W., and Sánchez Alvarado, A. (2010). Expression of secreted *Wnt* pathway components reveals unexpected complexity of the planarian amputation response. *Developmental biology* 347, 24-39.
- Haas, B.J., Papanicolaou, A., Yassour, M., Grabherr, M., Blood, P.D., Bowden, J., Couger, M.B., Eccles, D., Li, B., Lieber, M., *et al.* (2013). De novo transcript sequence reconstruction from RNA-seq using the Trinity platform for reference generation and analysis. *Nature protocols* 8, 1494-1512.
- Hayashi, T., Asami, M., Higuchi, S., Shibata, N., and Agata, K. (2006). Isolation of planarian X-ray-sensitive stem cells by fluorescence-activated cell sorting. *Development, growth & differentiation* 48, 371-380.
- Kao, D., Felix, D., and Aboobaker, A. (2013). The planarian regeneration transcriptome reveals a shared but temporally shifted regulatory program between opposing head and tail scenarios. *BMC genomics* 14, 797.
- Lechner, M., Findeiss, S., Steiner, L., Marz, M., Stadler, P.F., and Prohaska, S.J. (2011). Proteinortho: detection of (co-)orthologs in large-scale analysis. *BMC Bioinformatics* 12, 124.
- Li, H., Handsaker, B., Wysoker, A., Fennell, T., Ruan, J., Homer, N., Marth, G., Abecasis, G., and Durbin, R. (2009). The Sequence Alignment/Map format and SAMtools. *Bioinformatics* 25, 2078-2079.
- Liu, S.Y., Selck, C., Friedrich, B., Lutz, R., Vila-Farre, M., Dahl, A., Brandl, H., Lakshmanaperumal, N., Henry, I., and Rink, J.C. (2013). Reactivating head regrowth in a regeneration-deficient planarian species. *Nature* 500, 81-84.
- McDavid, A., Finak, G., Chattopadhyay, P.K., Dominguez, M., Lamoreaux, L., Ma, S.S., Roederer, M., and Gottardo, R. (2013). Data exploration, quality control and testing in single-cell qPCR-based gene expression experiments. *Bioinformatics* 29, 461-467.
- Petersen, C.P., and Reddien, P.W. (2008). *Smed-betacatenin-1* is required for anteroposterior blastema polarity in planarian regeneration. *Science* 319, 327-330.
- Picelli, S., Bjorklund, A.K., Faridani, O.R., Sagasser, S., Winberg, G., and Sandberg, R. (2013). Smart-seq2 for sensitive full-length transcriptome profiling in single cells. *Nature methods* 10, 1096-1098.
- Picelli, S., Faridani, O.R., Bjorklund, A.K., Winberg, G., Sagasser, S., and Sandberg, R. (2014). Full-length RNA-seq from single cells using Smart-seq2. *Nature protocols* 9, 171-181.

Quinlan, A.R., and Hall, I.M. (2010). BEDTools: a flexible suite of utilities for comparing genomic features. *Bioinformatics* 26, 841-842.

Reddien, P.W. (2011). Constitutive gene expression and the specification of tissue identity in adult planarian biology. *Trends in genetics : TIG* 27, 277-285.

Reddien, P.W., Oviedo, N.J., Jennings, J.R., Jenkin, J.C., and Sánchez Alvarado, A. (2005). SMEDWI-2 is a PIWI-like protein that regulates planarian stem cells. *Science* 310, 1327-1330.

Robinson, M.D., McCarthy, D.J., and Smyth, G.K. (2010). edgeR: a Bioconductor package for differential expression analysis of digital gene expression data. *Bioinformatics* 26, 139-140.

Sandmann, T., Vogg, M.C., Owlarn, S., Boutros, M., and Bartscherer, K. (2011). The head-regeneration transcriptome of the planarian *Schmidtea mediterranea*. *Genome biology* 12, R76.

Satija, R., Farrell, J.A., Gennert, D., Schier, A.F., and Regev, A. (2015). Spatial reconstruction of single-cell gene expression data. *Nature biotechnology*.

Schwartz, S., Bernstein, D.A., Mumbach, M.R., Jovanovic, M., Herbst, R.H., Leon-Ricardo, B.X., Engreitz, J.M., Guttman, M., Satija, R., Lander, E.S., *et al.* (2014). Transcriptome-wide mapping reveals widespread dynamic-regulated pseudouridylation of ncRNA and mRNA. *Cell* 159, 148-162.

Scimone, M.L., Kravarik, K.M., Lapan, S.W., and Reddien, P.W. (2014). Neoblast specialization in regeneration of the planarian *Schmidtea mediterranea*. *Stem cell reports* 3, 339-352.

Shalek, A.K., Satija, R., Shuga, J., Trombetta, J.J., Gennert, D., Lu, D., Chen, P., Gertner, R.S., Gaublomme, J.T., Yosef, N., *et al.* (2014). Single-cell RNA-seq reveals dynamic paracrine control of cellular variation. *Nature* 510, 363-369.

Sivriver, J., Habib, N., and Friedman, N. (2011). An integrative clustering and modeling algorithm for dynamical gene expression data. *Bioinformatics* 27, i392-400.

van Wolfswinkel, J.C., Wagner, D.E., and Reddien, P.W. (2014). Single-cell analysis reveals functionally distinct classes within the planarian stem cell compartment. *Cell stem cell* 15, 326-339.

Vogg, M.C., Owlarn, S., Perez Rico, Y.A., Xie, J., Suzuki, Y., Gentile, L., Wu, W., and Bartscherer, K. (2014). Stem cell-dependent formation of a functional anterior regeneration pole in planarians requires Zic and Forkhead transcription factors. *Developmental biology* 390, 136-148.

Wagner, D.E., Ho, J.J., and Reddien, P.W. (2012). Genetic regulators of a pluripotent adult stem cell system in planarians identified by RNAi and clonal analysis. *Cell stem cell* 10, 299-311.

Wenemoser, D., Lapan, S.W., Wilkinson, A.W., Bell, G.W., and Reddien, P.W. (2012). A molecular wound response program associated with regeneration initiation in planarians. *Genes & development* 26, 988-1002.
